# Supplementary material for: Angiosperm flowers reached their highest morphological diversity early in their evolutionary history
Source: New Phytol. 2023 Nov 29;241(3):1348–60. doi: 10.1111/nph.19389 (PMC10952840; doi:10.1111/nph.19389)

## ***New Phytologist* Supporting Information Data S5**

**Article title:** Angiosperm flowers reached their highest morphological diversity early in their evolutionary history

**Authors:** Andrea M. López-Martínez, Maria von Balthazar, Jürg Schönenberger, Susana Magallón, Hervé Sauquet, Marion Chartier

**Article acceptance date:** 20 October 2023

**Content:** Ancestral state reconstructions for each character obtained with a stochastic mapping approach.

Stochastic character mapping  
201\_B. Number of perianth parts (D2c)  
ER model, fixed tree, 500 sim

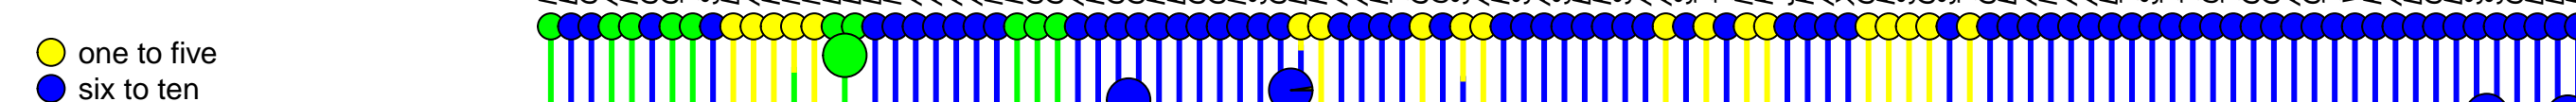

| Node             | State      | Prob  |
|------------------|------------|-------|
| Angiospermae     | six to ten | 0.886 |
| Mesangiospermae  | six to ten | 1     |
| Magnoliidae      | six to ten | 1     |
| Monocotyledoneae | six to ten | 1     |
| Eudicotyledoneae | six to ten | 0.994 |
| Commelinellidae  | six to ten | 1     |
| Pentapetalae     | six to ten | 1     |
| Superasteridae   | six to ten | 1     |
| Asteridae        | six to ten | 1     |
| Lamiidae         | six to ten | 1     |
| Campanulidae     | six to ten | 1     |
| Superrosidae     | six to ten | 1     |
| Rosidae          | six to ten | 1     |
| Malvidae         | six to ten | 1     |
| Fabidae          | six to ten | 1     |

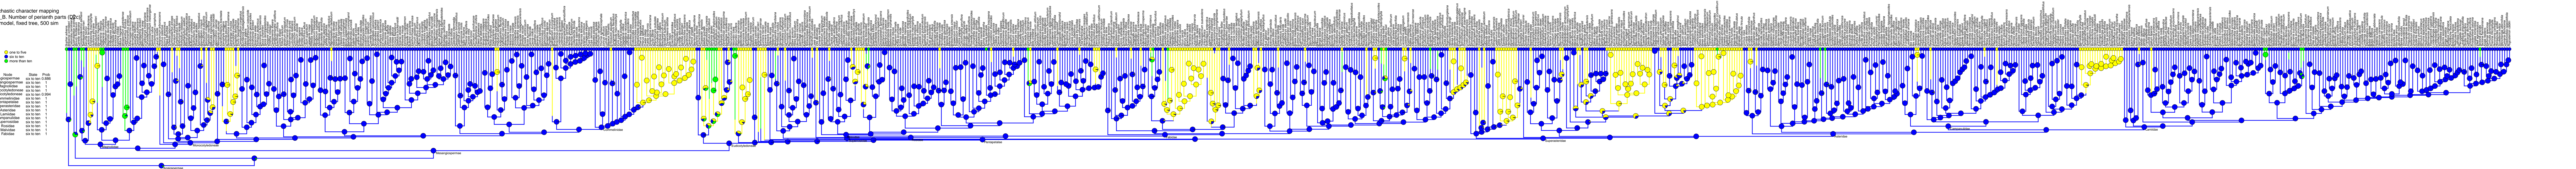

Stochastic character mapping  
100\_B\_Structural sex of flowers (D2d)  
ER model, fixed tree, 500 sim

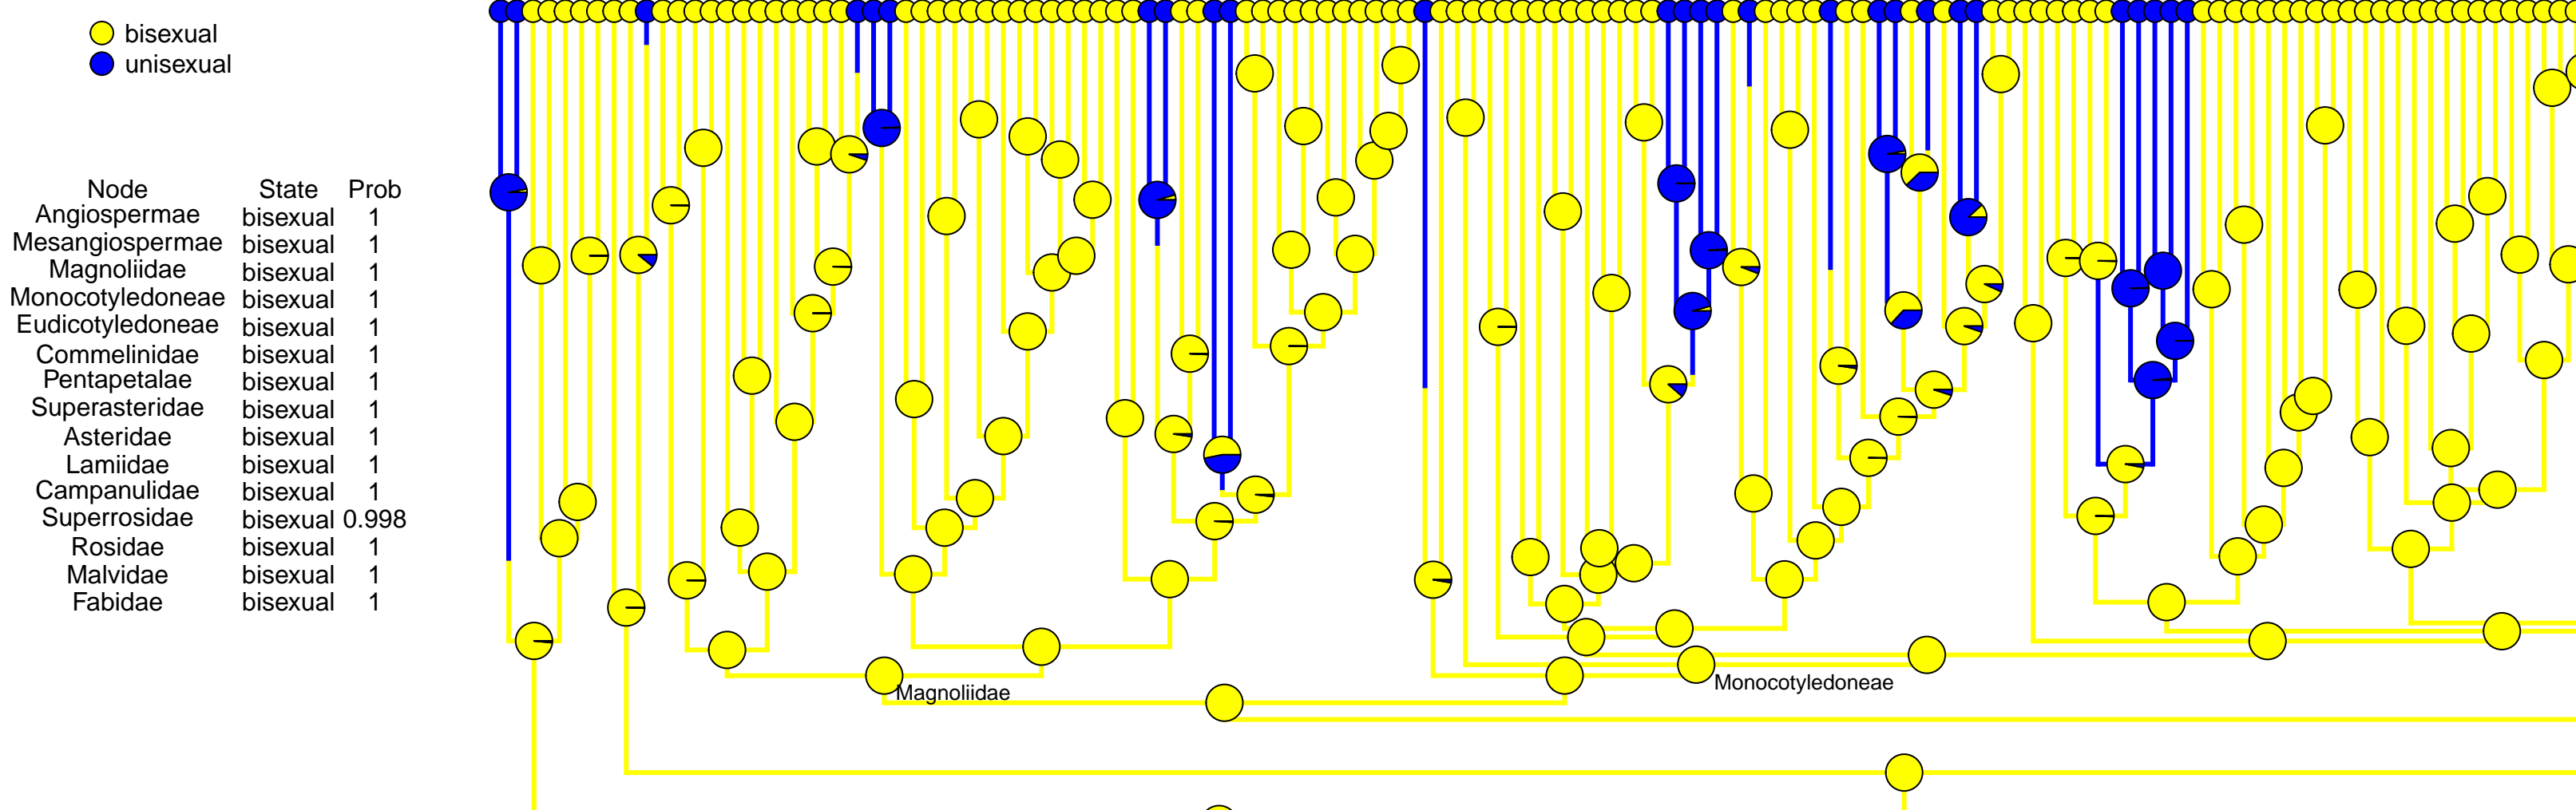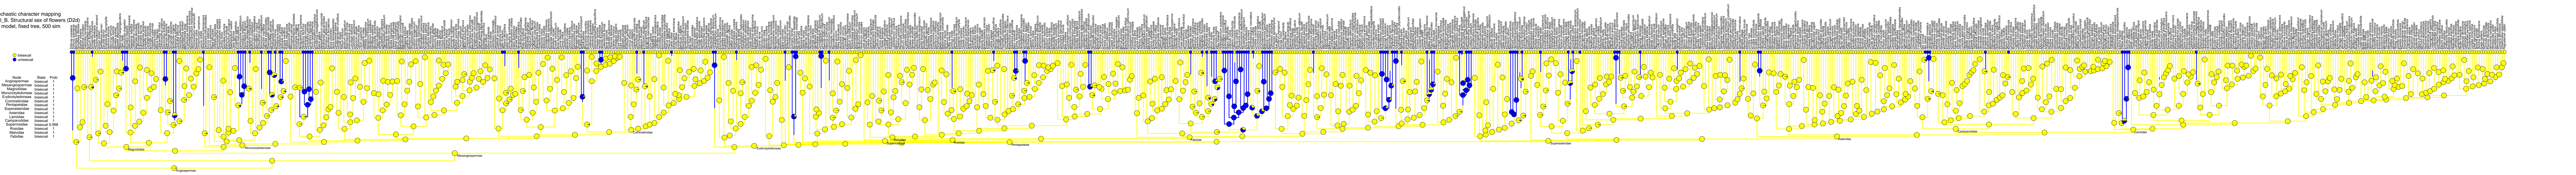

chastic character mapping  
\_B. Ovary position (binary) (D2d)  
model fixed tree 500 sim

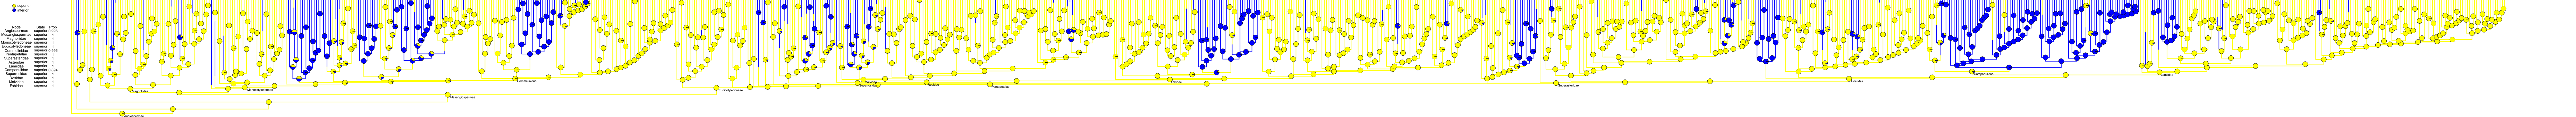

Stochastic character mapping  
 201\_A\_Perianth presence (D2c)  
 ER model, fixed tree, 500 sim

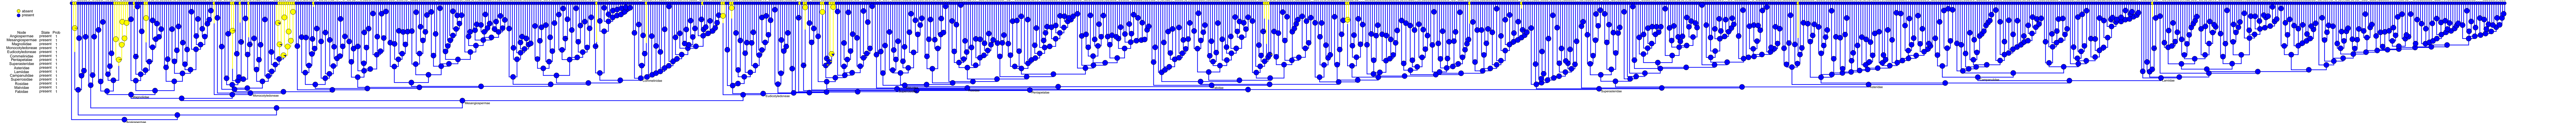

stochastic character mapping  
 104\_A. Fusion of perianth (D2c)  
 RR model, fixed tree, 500 sim

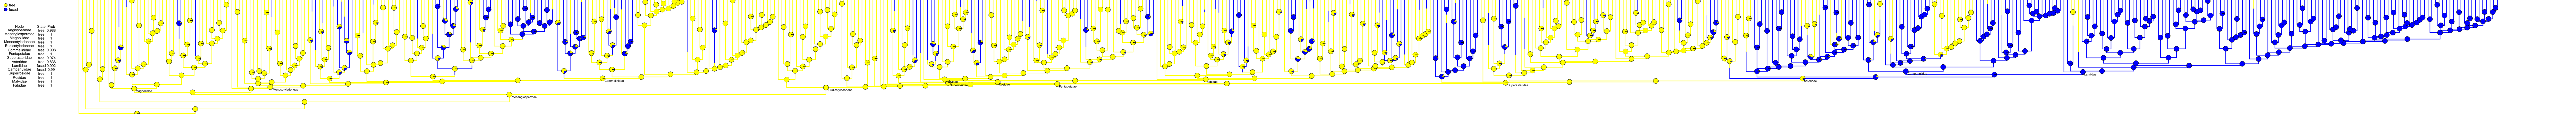

Stochastic character mapping  
207\_A. Symmetry of perianth (D2D)  
ER model, fixed tree, 500 sim

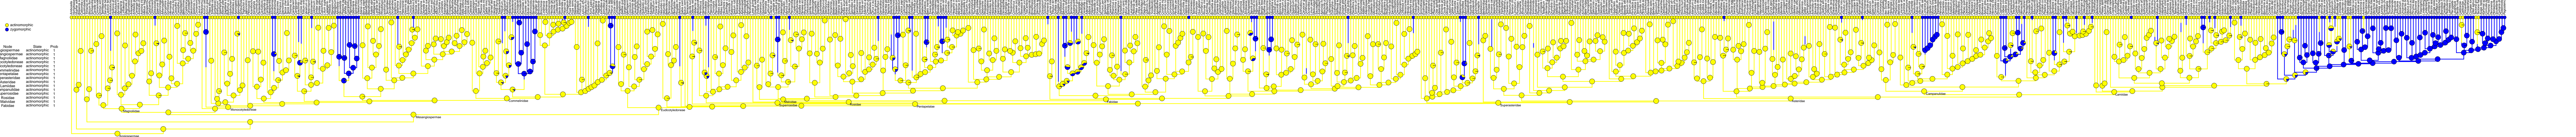

Stochastic character mapping  
230\_A\_Perianth phylotaxy (D2d)  
ER model, fixed tree, 500 sim

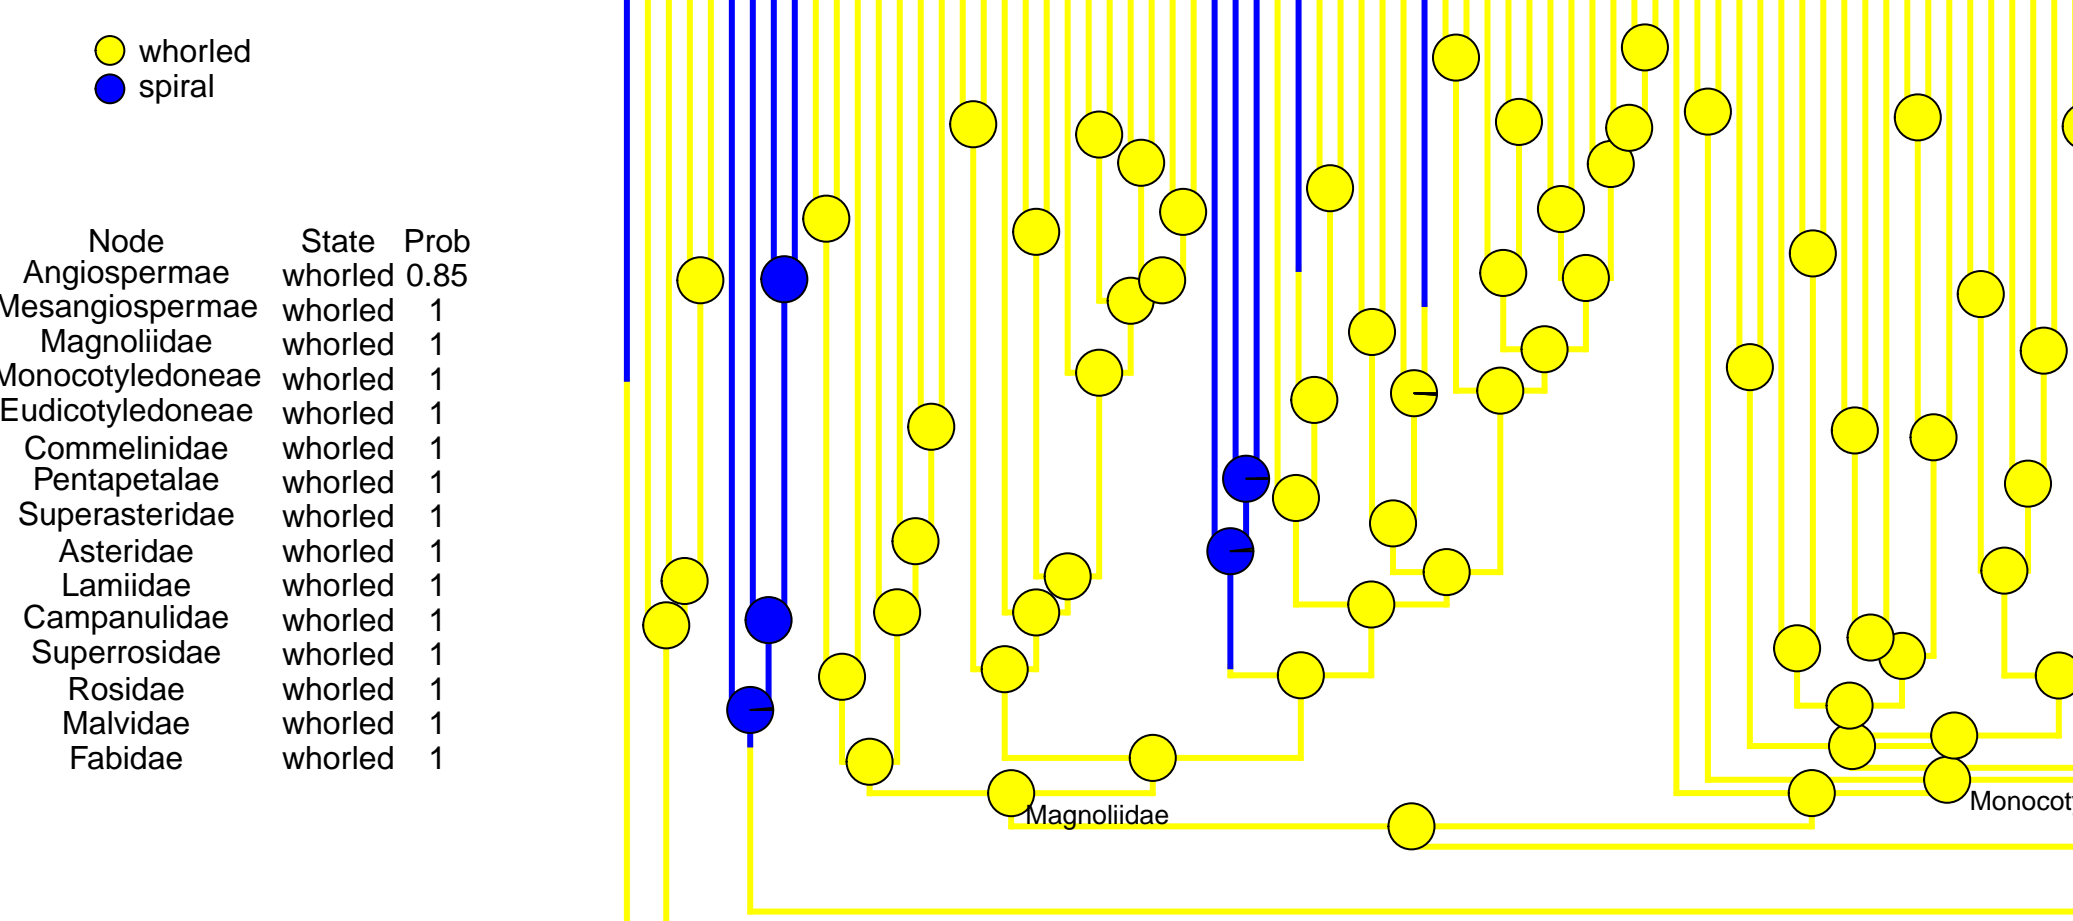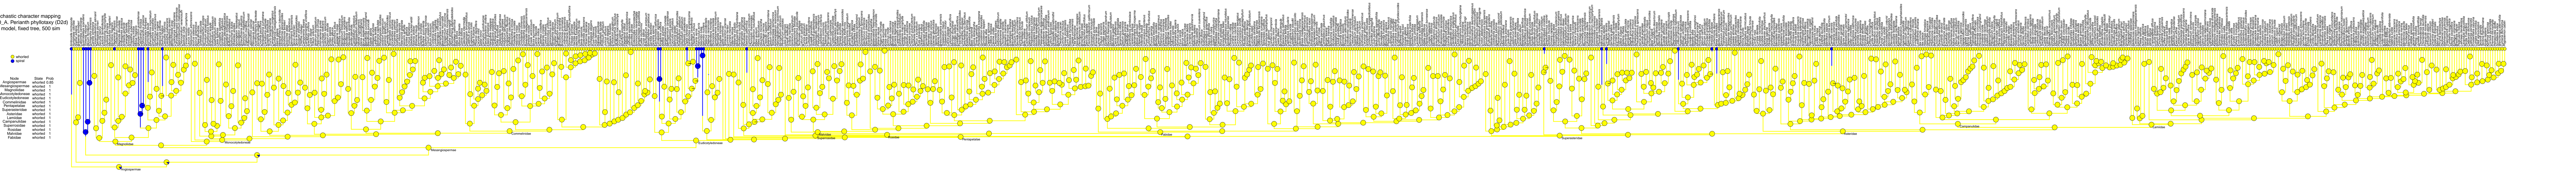

Stochastic character mapping  
 231\_A. Number of perianth whorls (D2C)  
 ER model, fixed tree, 500 sim

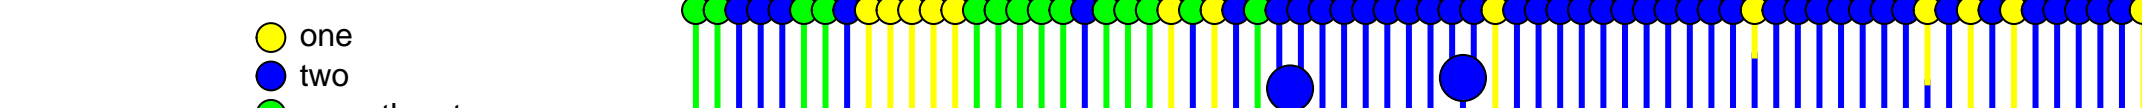

| Node             | State | Prob  |
|------------------|-------|-------|
| Angiospermae     | two   | 0.854 |
| Mesangiospermae  | two   | 0.928 |
| Magnoliidae      | two   | 0.836 |
| Monocotyledoneae | two   | 0.998 |
| Eudicotyledoneae | two   | 0.932 |
| Commelinidae     | two   | 1     |
| Pentapetalae     | two   | 1     |
| Superasteridae   | two   | 1     |
| Asteridae        | two   | 1     |
| Lamiidae         | two   | 1     |
| Campanulidae     | two   | 1     |
| Superrosidae     | two   | 1     |
| Rosidae          | two   | 1     |
| Malvidae         | two   | 1     |
| Fabidae          | two   | 1     |

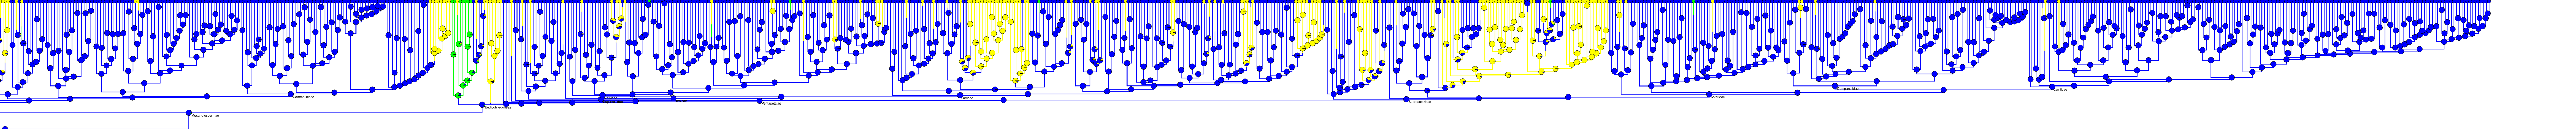

stochastic character mapping  
32 A. Perianth merism (D2c)  
B. model fixed tree, 500 sim

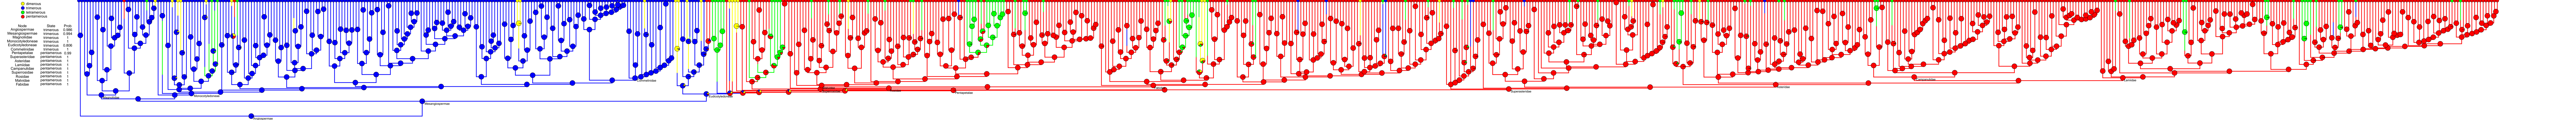

Stochastic character mapping  
234\_B\_Perianth differentiation (D2d)  
ER model, fixed tree, 500 sim

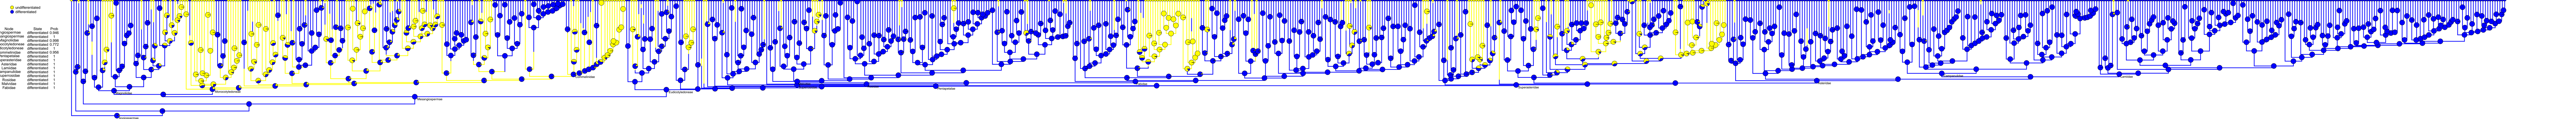

Stochastic character mapping  
301\_B. Number of fertile stamens (D2o)  
ER model, fixed tree, 500 sim

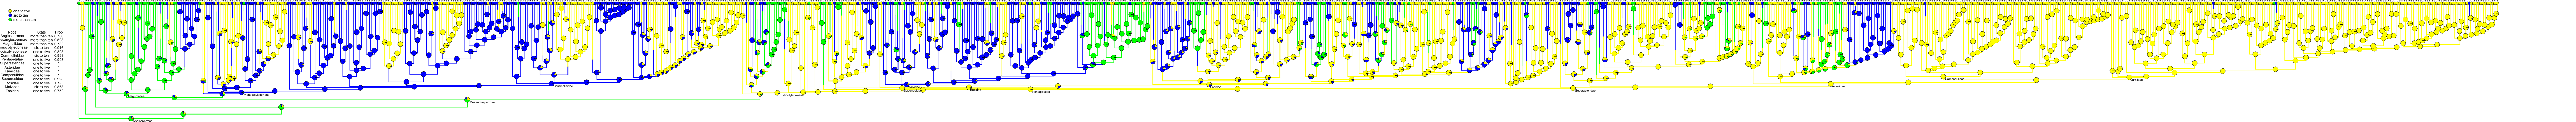

# Stochastic character mapping

## 305\_A\_Filament (binary) (D2d)

### ER model, fixed tree, 500 sim

● laminar  
● typical

| Node             | State   | Prob  |
|------------------|---------|-------|
| Angiospermae     | typical | 0.926 |
| Mesangiospermae  | typical | 0.99  |
| Magnoliidae      | typical | 0.99  |
| Monocotyledoneae | typical | 0.996 |
| Eudicotyledoneae | typical | 1     |
| Commelinidae     | typical | 1     |
| Pentapetalae     | typical | 1     |
| Superasteridae   | typical | 1     |
| Asteridae        | typical | 1     |
| Lamiidae         | typical | 1     |
| Campanulidae     | typical | 0.998 |
| Superrosidae     | typical | 1     |
| Rosidae          | typical | 1     |
| Malvidae         | typical | 1     |
| Fabidae          | typical | 1     |

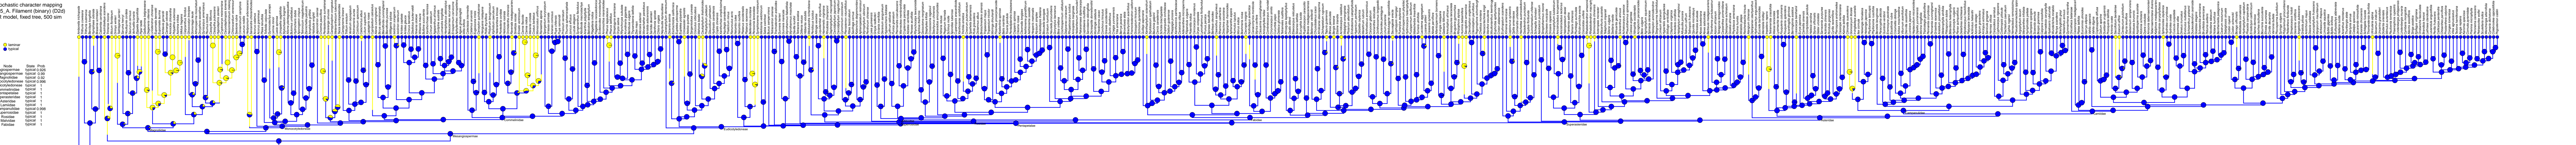

## 206 A. Fusion of filaments (D3c)

ER model fixed tree 500 sim

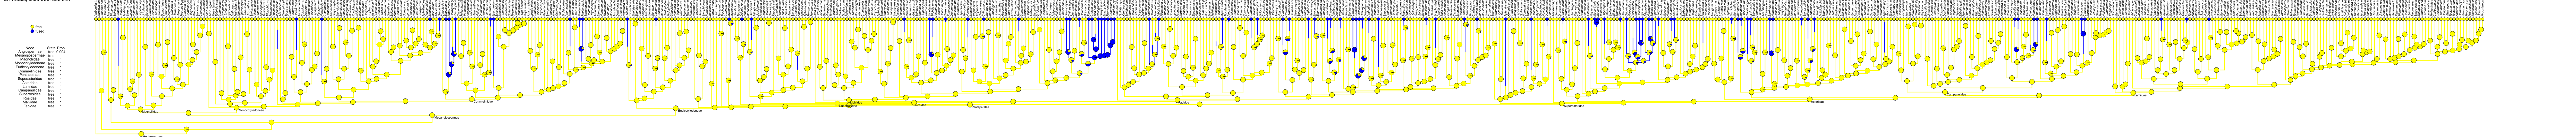

*ntha*  
*atica*  
*ia penduliflo*  
*ta*  
*rum*  
*ida*

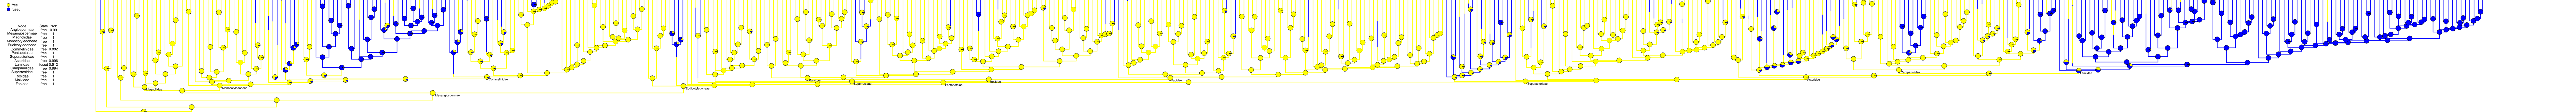



Stochastic character mapping

312\_A. Anther attachment (binary) (D2d)

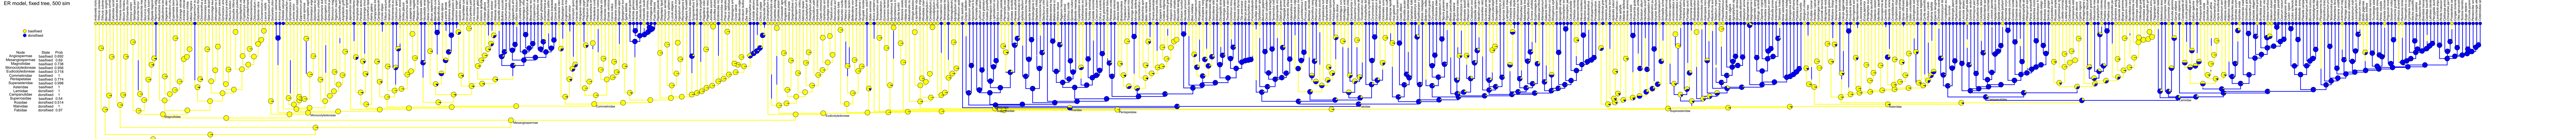



Stochastic character mapping

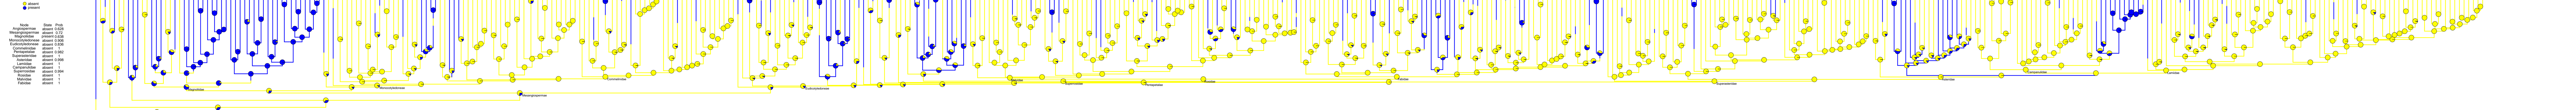

hastic character mapping  
A. Androecium structural phyllotaxy D20

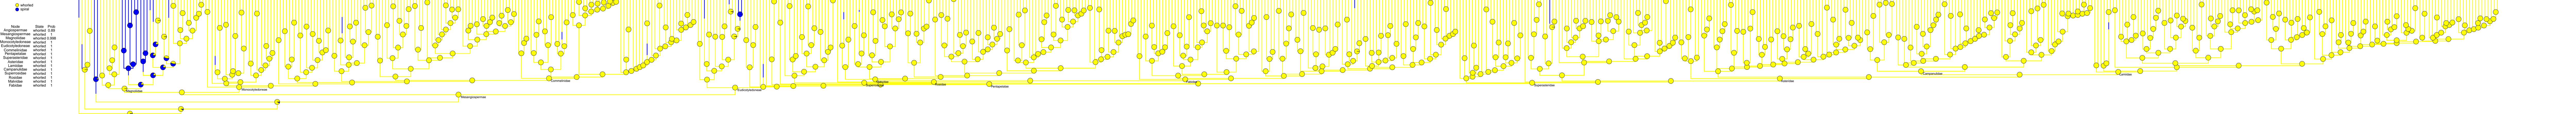

**331** **A.** Number of androecium structural whorls D20  
 59 **B.** Total fixed to EVI axis

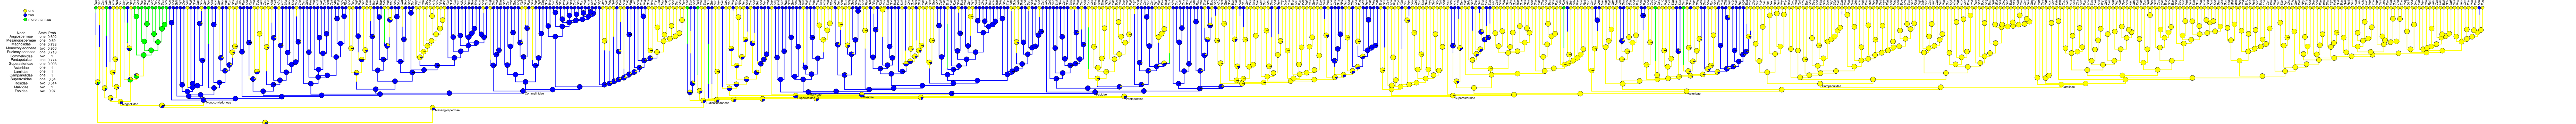

Stochastic character mapping

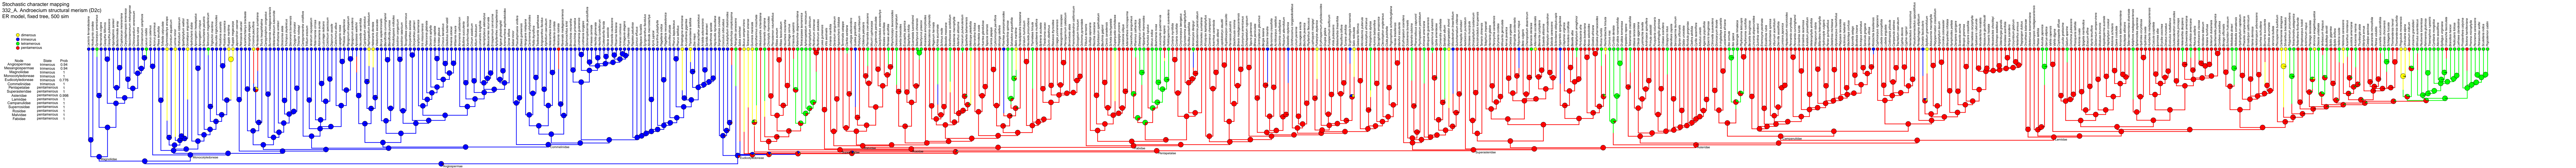

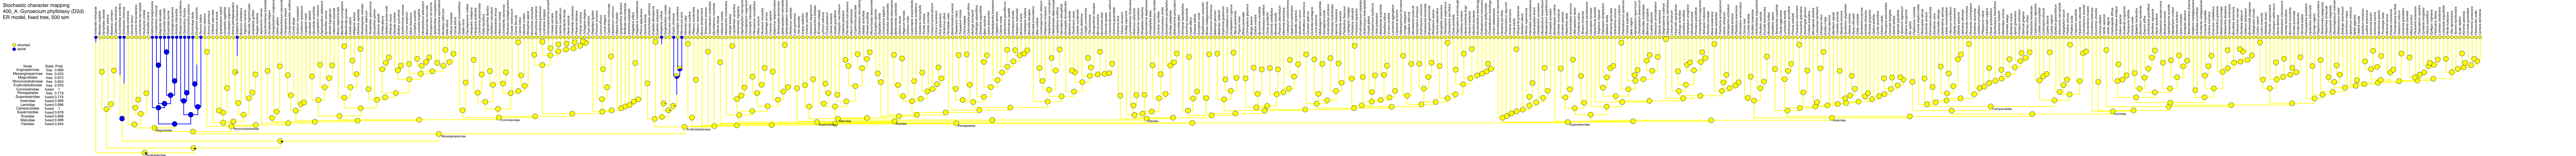

## 01 B Number of structural carpels (D20)

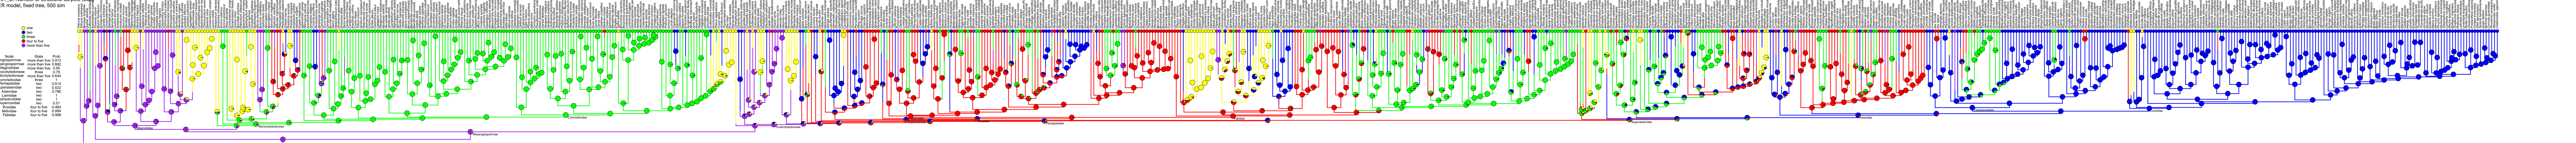

Stochastic character mapping  
403\_A. Fusion of ovaries (binary) (D2c)  
ER model, fixed tree, 500 sim

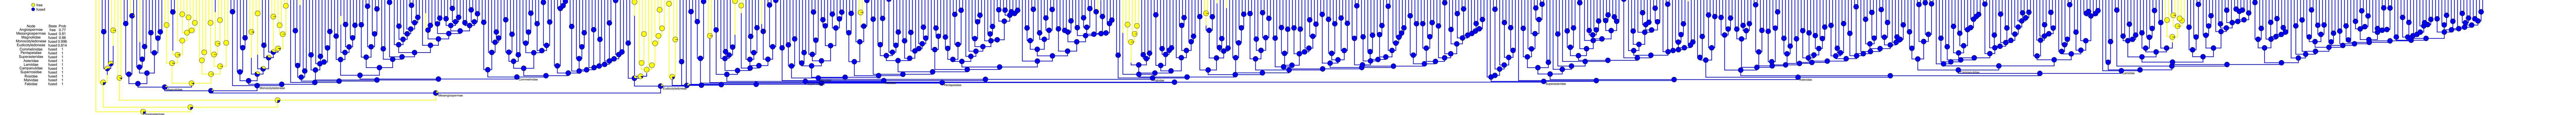

hastic character mapping  
B. Style differentiation (D2)  
model, fixed tree, 500 sim

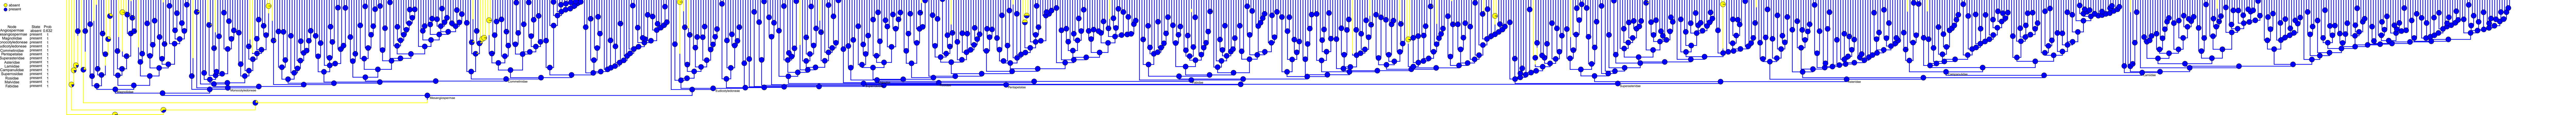

stochastic character mapping

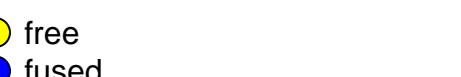

| Node             | State | Prob  |
|------------------|-------|-------|
| Angiospermae     | free  | 0.968 |
| Mesangiospermae  | free  | 0.976 |
| Magnoliidae      | free  | 0.972 |
| Monocotyledoneae | free  | 0.824 |
| Eudicotyledoneae | free  | 0.976 |
| Commelinidae     | fused | 1     |
| Pentapetalae     | free  | 0.718 |
| Superasteridae   | fused | 0.774 |
| Asteridae        | fused | 0.988 |
| Lamiidae         | fused | 0.996 |
| Campanulidae     | fused | 1     |
| Superrosidae     | fused | 0.678 |
| Rosidae          | fused | 0.898 |
| Malvidae         | fused | 0.998 |
| Malvaceae        | fused | 1     |

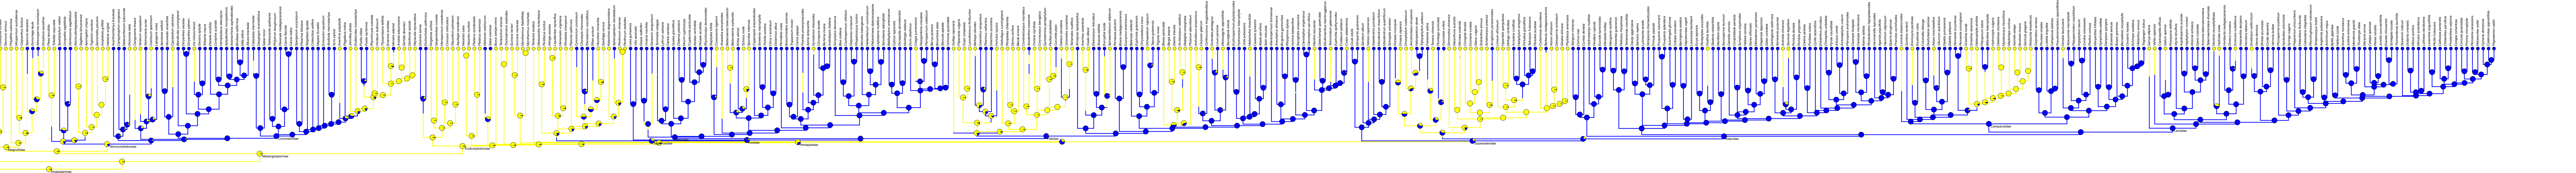

Stochastic character mapping  
411\_A. Number of ovules per functional carpel (D2c)  
ER model, fixed tree, 500 sim

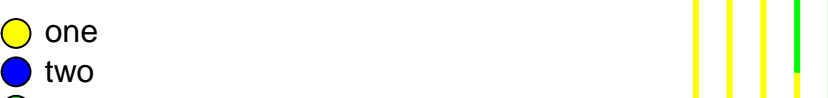

| Node             | State         | Prob  |
|------------------|---------------|-------|
| Angiospermae     | one           | 0.79  |
| Mesangiospermae  | one           | 0.92  |
| Magnoliidae      | one           | 0.794 |
| Monocotyledoneae | one           | 0.796 |
| Eudicotyledoneae | one           | 0.8   |
| Commelinidae     | one           | 0.922 |
| Pentapetalae     | one           | 0.778 |
| Superasteridae   | one           | 0.948 |
| Asteridae        | one           | 0.952 |
| Lamiidae         | one           | 0.874 |
| Campanulidae     | one           | 0.946 |
| Superrosidae     | three or more | 0.532 |
| Rosidae          | three or more | 0.536 |
| Malvidae         | three or more | 0.682 |
| Fabidae          | two           | 0.484 |

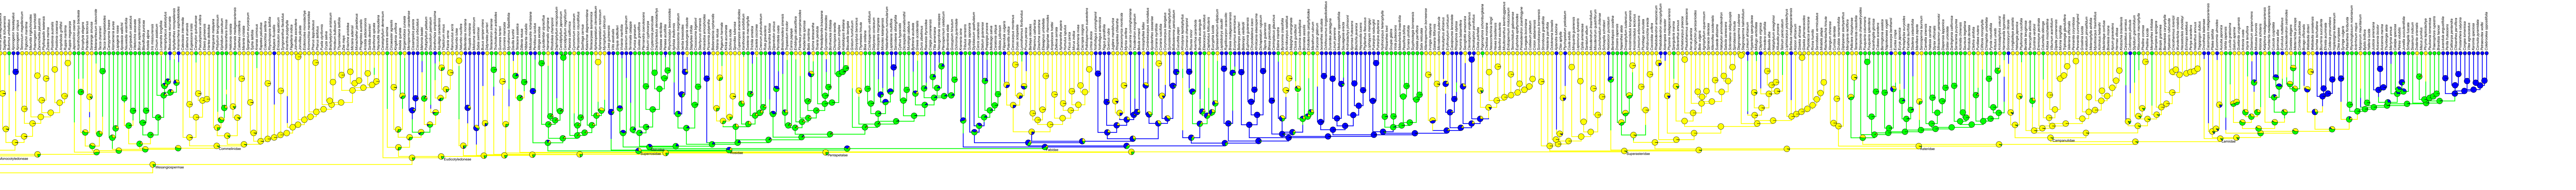

Stochastic character mapping  
412\_A. Placentation (D2d)  
ER model, fixed tree, 500 sim

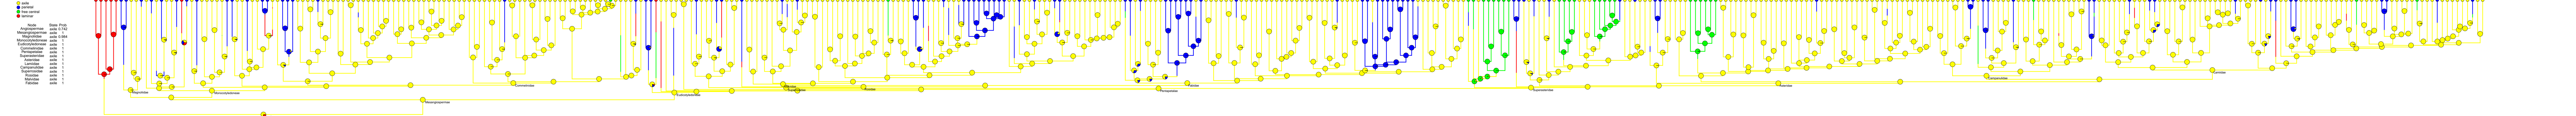

Stochastic character mapping  
5000 A. Number of apertures (D2c)  
ER model, fixed tree, 500 sim

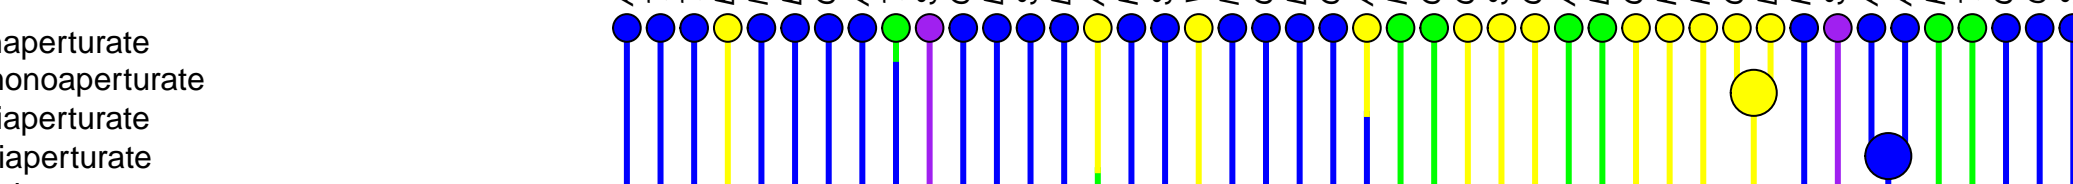

| Node             | State          | Prob  |
|------------------|----------------|-------|
| Angiospermae     | monoaperturate | 0.996 |
| Mesangiospermae  | monoaperturate | 0.996 |
| Magnoliidae      | monoaperturate | 1     |
| Monocotyledoneae | monoaperturate | 1     |
| Eudicotyledoneae | triaperturate  | 1     |
| Commelinidae     | monoaperturate | 1     |
| Pentapetalae     | triaperturate  | 1     |
| Superasteridae   | triaperturate  | 1     |
| Asteridae        | triaperturate  | 1     |
| Lamiidae         | triaperturate  | 1     |
| Campanulidae     | triaperturate  | 1     |
| Superosidae      | triaperturate  | 1     |
| Rosidae          | triaperturate  | 1     |
| Malvidae         | triaperturate  | 1     |
| Fabidae          | triaperturate  | 1     |

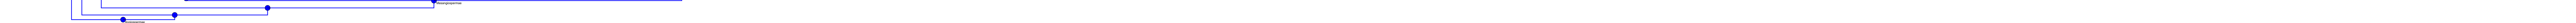

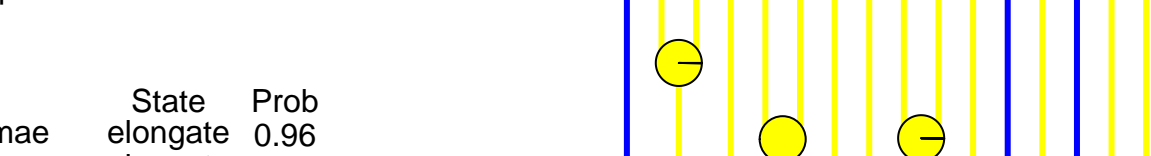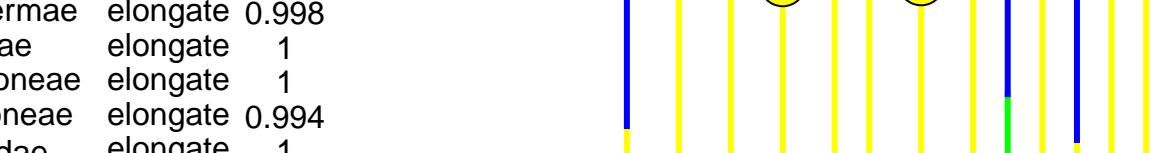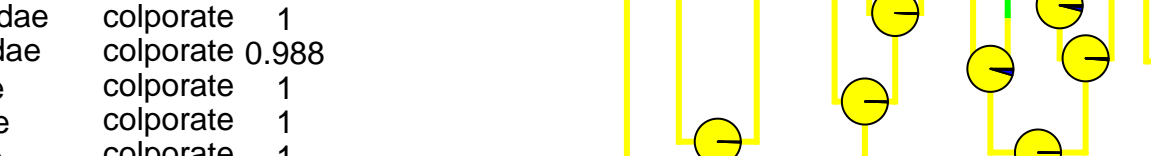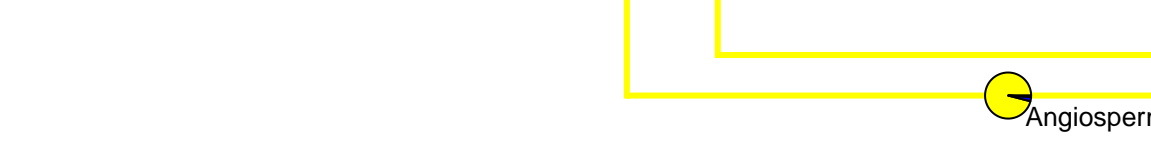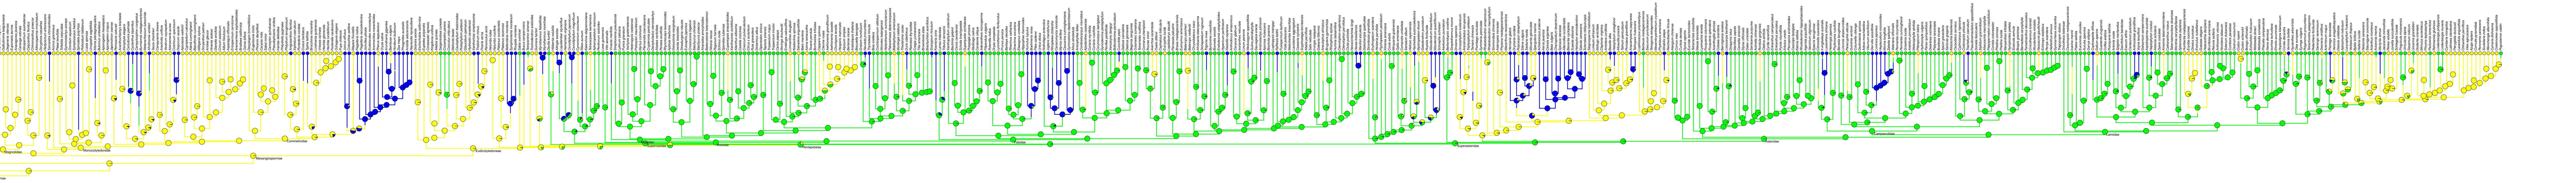

Supplement: Supplementary file 5 — Dataset S5 Ancestral state reconstructions for each character obtained with a stochastic mapping approach. [file NPH-241-1348-s002.pdf]
