# Supplementary material for: Angiosperm flowers reached their highest morphological diversity early in their evolutionary history
Source: New Phytol. 2023 Nov 29;241(3):1348–60. doi: 10.1111/nph.19389 (PMC10952840; doi:10.1111/nph.19389)

## ***New Phytologist* Supporting Information Data S4**

**Article title:** Angiosperm flowers reached their highest morphological diversity early in their evolutionary history

**Authors:** Andrea M. López-Martínez, Maria von Balthazar, Jürg Schönenberger, Susana Magallón, Hervé Sauquet, Marion Chartier

**Article acceptance date:** 20 October 2023

**Content:** Ancestral state reconstructions for each character obtained with a maximum likelihood approach.

ML ancestral state reconstruction using rayDISC (R:corHMM)  
 100\_B. Structural sex of flowers (D2d), ARD model

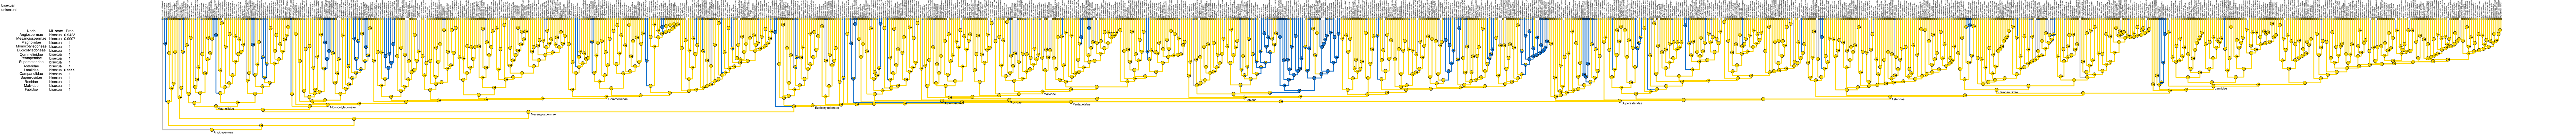

ML ancestral state reconstruction using rayDISC (R:corHMM)  
100\_B. Structural sex of flowers (D2d), ER model

● bisexual  
● unisexual

| Node             | ML state | Prob  |
|------------------|----------|-------|
| Angiospermae     | bisexual | 0.987 |
| Mesangiospermae  | bisexual | 1     |
| Magnoliidae      | bisexual | 1     |
| Monocotyledoneae | bisexual | 1     |
| Eudicotyledoneae | bisexual | 1     |
| Commelinidae     | bisexual | 1     |
| Pentapetalae     | bisexual | 1     |
| Superasteridae   | bisexual | 1     |
| Asteridae        | bisexual | 1     |
| Lamiidae         | bisexual | 1     |
| Campanulidae     | bisexual | 1     |
| Superrosidae     | bisexual | 1     |
| Rosidae          | bisexual | 1     |
| Malvidae         | bisexual | 1     |
| Fabidae          | bisexual | 1     |

Magnoliidae

Monocotyledoneae

Commelinidae

Eudicotyledoneae

Superrosidae

Rosidae

Pentapetalae

Fabidae

Superasteridae

Asteridae

Campanulidae

Lamiidae

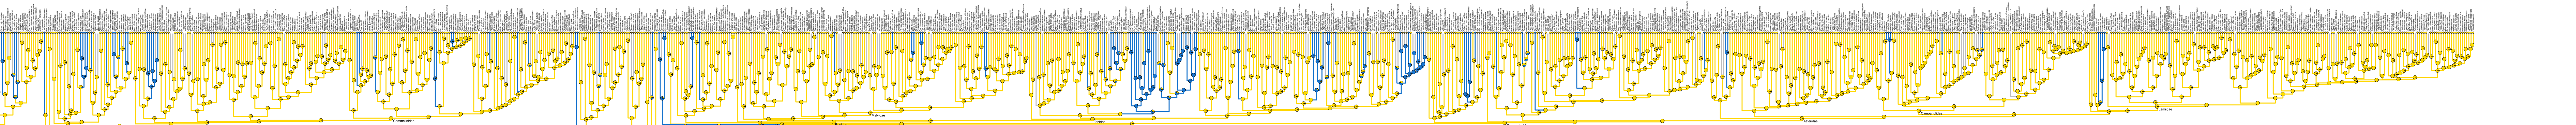

ML ancestral state reconstruction using rayDISC (R:corHMM)  
 102\_B. Ovary position (binary) (D2d), ARD model

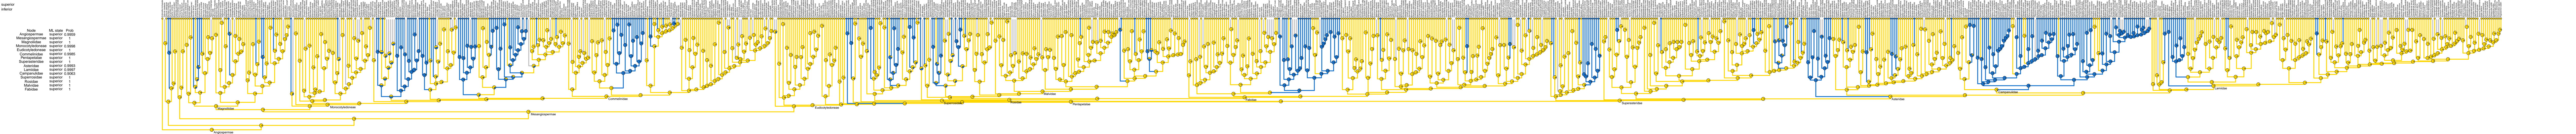

ML ancestral state reconstruction using rayDISC (R:corHMM)  
102\_B. Ovary position (binary) (D2d), ER model

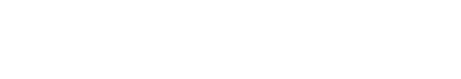

| Node             | ML state | Prob   |
|------------------|----------|--------|
| Angiospermae     | superior | 0.9953 |
| Mesangiospermae  | superior | 1      |
| Magnolidae       | superior | 1      |
| Monocotyledoneae | superior | 0.9997 |
| Eudicotyledoneae | superior | 1      |
| Commelinidae     | superior | 0.9975 |
| Pentapetalae     | superior | 1      |
| Superasteridae   | superior | 1      |
| Asteridae        | superior | 0.9992 |
| Lamiidae         | superior | 0.9997 |
| Campanulidae     | superior | 0.8963 |
| Superrosidae     | superior | 1      |
| Rosidae          | superior | 1      |
| Malvidae         | superior | 1      |
| Fabidae          | superior | 1      |

Angiospermae

Magnolidae

Monocotyledoneae

Commelinidae

Superrosidae

Rosidae

Pentapetalae

Fabidae

Malvidae

Superasteridae

Asteridae

Campanulidae

Lamiidae

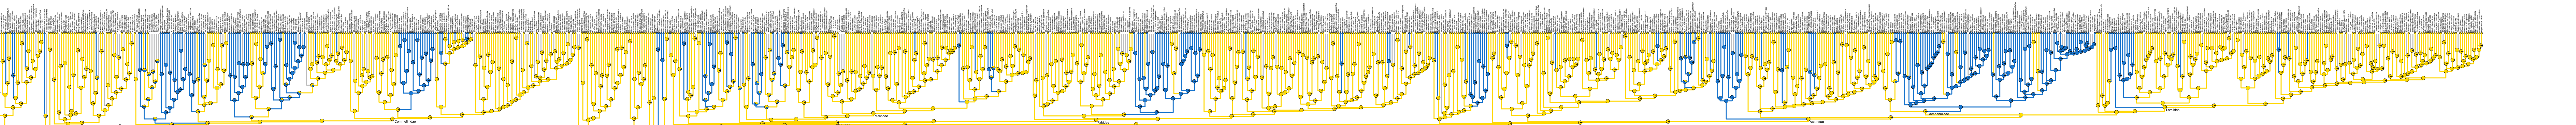

ML ancestral state reconstruction using rayDISC (R:corHMM)  
 201\_A. Perianth presence (D2c), ARD model

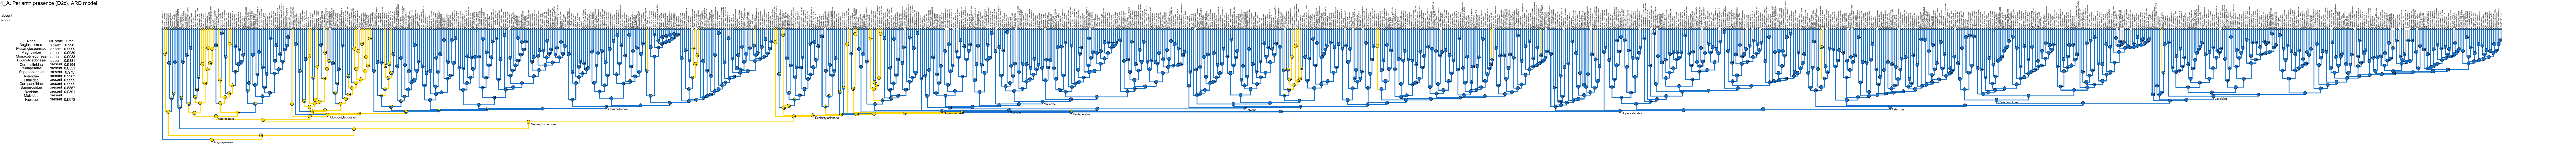

ML ancestral state reconstruction using rayDISC (R:corHMM)

201\_A. Perianth presence (D2c), ER model

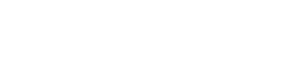

| Node             | ML state | Prob   |
|------------------|----------|--------|
| Angiospermae     | present  | 0.9997 |
| Mesangiospermae  | present  | 1      |
| Magnoliidae      | present  | 1      |
| Monocotyledoneae | present  | 1      |
| Eudicotyledoneae | present  | 1      |
| Commelinidae     | present  | 1      |
| Pentapetalae     | present  | 1      |
| Superasteridae   | present  | 1      |
| Asteridae        | present  | 1      |
| Lamiidae         | present  | 1      |
| Campanulidae     | present  | 1      |
| Superrosidae     | present  | 1      |
| Rosidae          | present  | 1      |
| Malvidae         | present  | 1      |
| Fabidae          | present  | 1      |

Node ML state Prob  
Angiospermae present 0.9997  
Mesangiospermae present 1  
Magnoliidae present 1  
Monocotyledoneae present 1  
Eudicotyledoneae present 1  
Comelinidae present 1  
Pentapetalae present 1  
Superasteridae present 1  
Asteridae present 1  
Lamiidae present 1  
Campanulidae present 1  
Superrosidae present 1  
Rosidae present 1  
Malvidae present 1  
Fabidae present 1

Angiospermae

Magnoliidae

Monocotyledoneae

Mesangiospermae

Commelinidae

Eudicotyledoneae

Superrosidae

Rosidae

Pentapetalae

Fabidae

Superasteridae

Asteridae

Campanulidae

Lamiidae

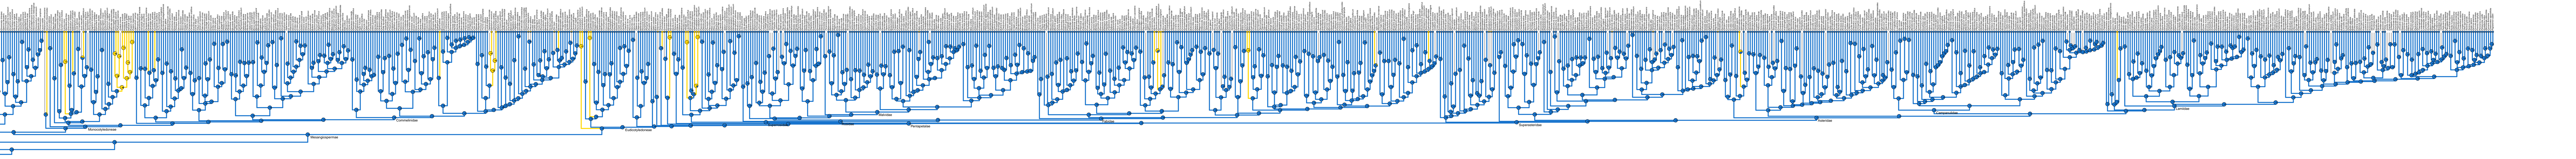

ML ancestral state reconstruction using rayDISC (R:corHMM)

201\_B. Number of perianth parts (3-state) (D2c), ARD model

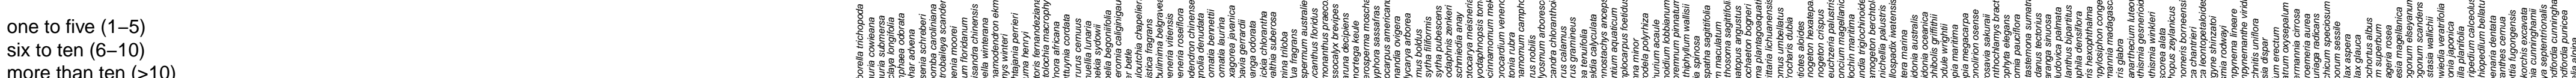

| Node             | ML state            | Prob   |
|------------------|---------------------|--------|
| Angiospermae     | more than ten (>10) | 0.9929 |
| Mesangiospermae  | more than ten (>10) | 0.9999 |
| Magnoliidae      | more than ten (>10) | 0.9998 |
| Monocotyledoneae | six to ten (6–10)   | 0.8164 |
| Eudicotyledoneae | more than ten (>10) | 0.9972 |
| Commelinidae     | six to ten (6–10)   | 1      |
| Pentapetalae     | six to ten (6–10)   | 0.8827 |
| Superasteridae   | six to ten (6–10)   | 0.9993 |
| Asteridae        | six to ten (6–10)   | 1      |
| Lamiidae         | six to ten (6–10)   | 1      |
| Campanulidae     | six to ten (6–10)   | 1      |
| Superrosidae     | six to ten (6–10)   | 0.9994 |
| Rosidae          | six to ten (6–10)   | 0.9996 |
| Malvidae         | six to ten (6–10)   | 1      |
| Fabidae          | six to ten (6–10)   | 1      |

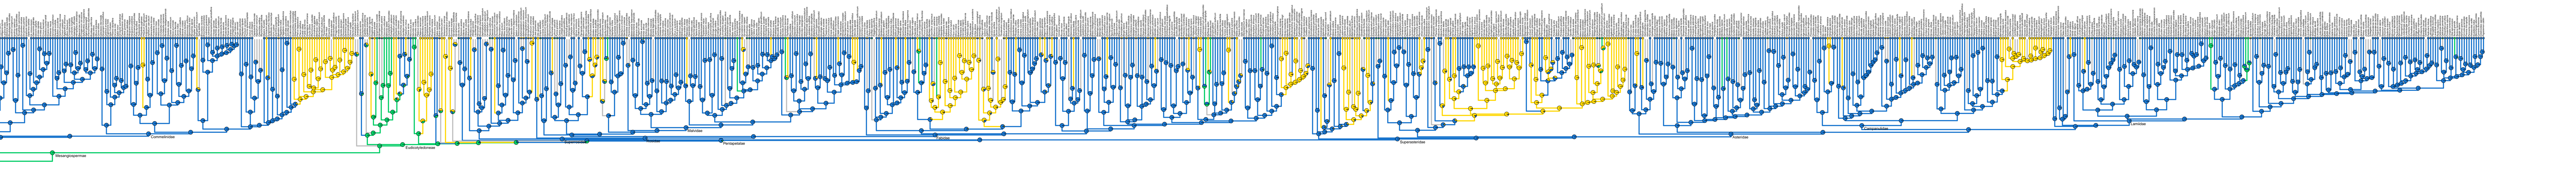

ML ancestral state reconstruction using rayDISC (R:corHMM)

201\_B. Number of perianth parts (3-state) (D2c), ER model



| Node             | ML state          | Prob   |
|------------------|-------------------|--------|
| Angiospermae     | six to ten (6-10) | 0.9315 |
| Mesangiospermae  | six to ten (6-10) | 0.9993 |
| Magnoliidae      | six to ten (6-10) | 0.9989 |
| Monocotyledoneae | six to ten (6-10) | 1      |
| Eudicotyledoneae | six to ten (6-10) | 0.9935 |
| Commelinidae     | six to ten (6-10) | 1      |
| Pentapetalae     | six to ten (6-10) | 0.9996 |
| Superasteridae   | six to ten (6-10) | 1      |
| Asteridae        | six to ten (6-10) | 1      |
| Lamiidae         | six to ten (6-10) | 1      |
| Campanulidae     | six to ten (6-10) | 1      |
| Superrosidae     | six to ten (6-10) | 1      |
| Rosidae          | six to ten (6-10) | 1      |
| Malvidae         | six to ten (6-10) | 1      |
| Fabidae          | six to ten (6-10) | 1      |

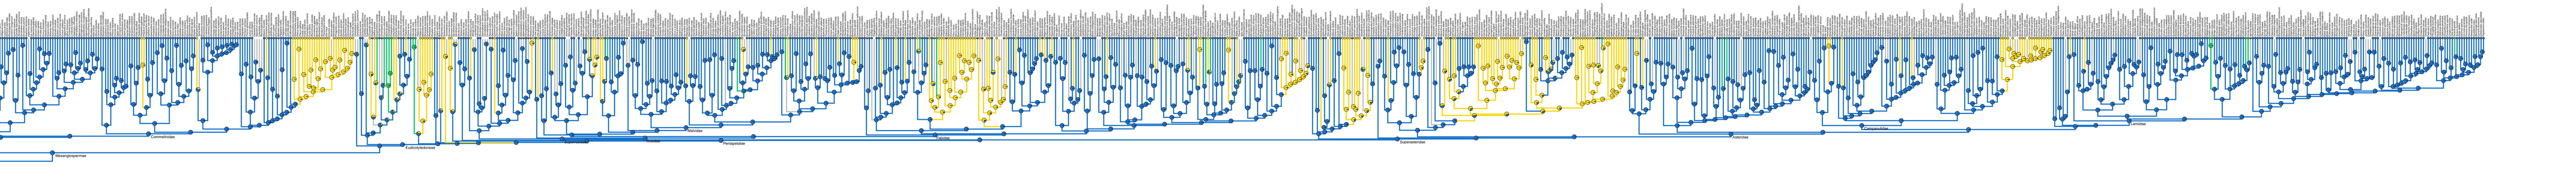

ML ancestral state reconstruction using rayDISC (R:corHMM)  
 204\_A. Fusion of perianth (D2c), ARD model

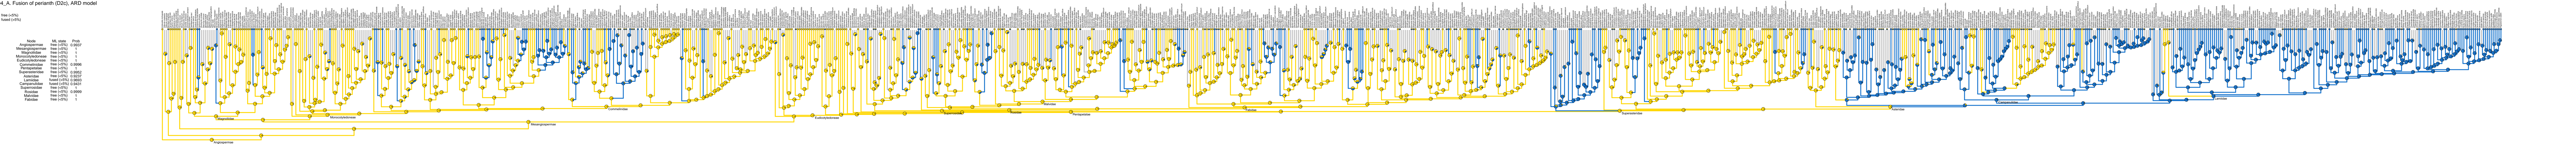

ML ancestral state reconstruction using rayDISC (R:corHMM)  
204\_A. Fusion of perianth (D2c), ER model

● free (<5%)  
● fused (>5%)

| Node             | ML state    | Prob   |
|------------------|-------------|--------|
| Angiospermae     | free (<5%)  | 0.9878 |
| Mesangiospermae  | free (<5%)  | 1      |
| Magnoliidae      | free (<5%)  | 0.9999 |
| Monocotyledoneae | free (<5%)  | 1      |
| Eudicotyledoneae | free (<5%)  | 1      |
| Commelinidae     | free (<5%)  | 0.9981 |
| Pentapetalae     | free (<5%)  | 0.9999 |
| Superasteridae   | free (<5%)  | 0.9744 |
| Asteridae        | free (<5%)  | 0.852  |
| Lamiidae         | fused (>5%) | 0.9951 |
| Campanulidae     | fused (>5%) | 0.9912 |
| Superrosidae     | free (<5%)  | 0.9998 |
| Rosidae          | free (<5%)  | 0.9998 |
| Malvidae         | free (<5%)  | 0.9999 |
| Fabidae          | free (<5%)  | 1      |

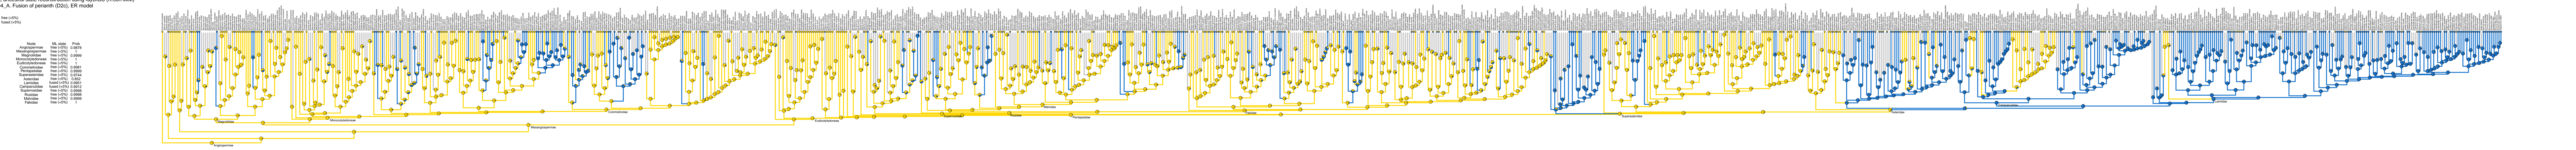

ML ancestral state reconstruction using rayDISC (R:corHMM)  
207\_A. Symmetry of perianth (binary) (D2d), ARD model

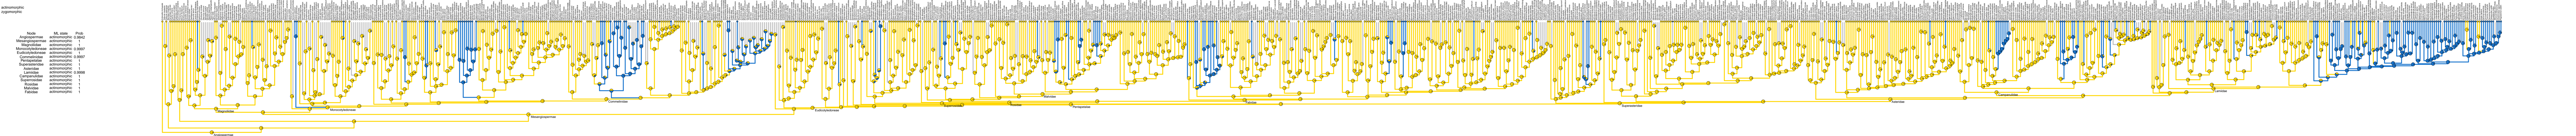

ML ancestral state reconstruction using rayDISC (R:corHMM)  
207\_A. Symmetry of perianth (binary) (D2d), ER model

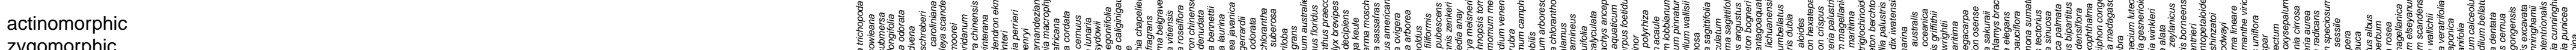

| Node             | ML state      | Prob   |
|------------------|---------------|--------|
| Angiospermae     | actinomorphic | 0.9965 |
| Mesangiospermae  | actinomorphic | 1      |
| Magnoliidae      | actinomorphic | 1      |
| Monocotyledoneae | actinomorphic | 0.9999 |
| Eudicotyledoneae | actinomorphic | 1      |
| Commelinidae     | actinomorphic | 1      |
| Pentapetalae     | actinomorphic | 1      |
| Superasteridae   | actinomorphic | 1      |
| Asteridae        | actinomorphic | 1      |
| Lamiidae         | actinomorphic | 1      |
| Campanulidae     | actinomorphic | 1      |
| Superrosidae     | actinomorphic | 1      |
| Rosidae          | actinomorphic | 1      |
| Malvidae         | actinomorphic | 1      |
| Fabidae          | actinomorphic | 1      |

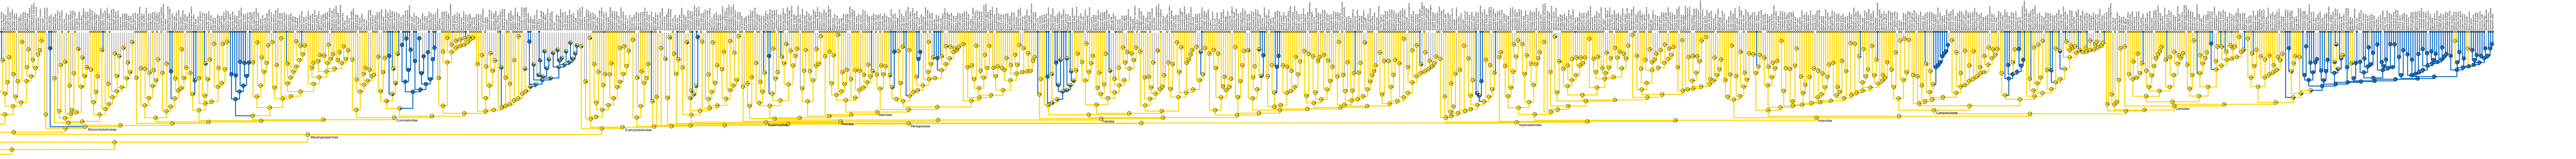

ML ancestral state reconstruction using rayDISC (R:corHMM)  
230\_A. Perianth phyllotaxy (binary) (D2d), ARD model

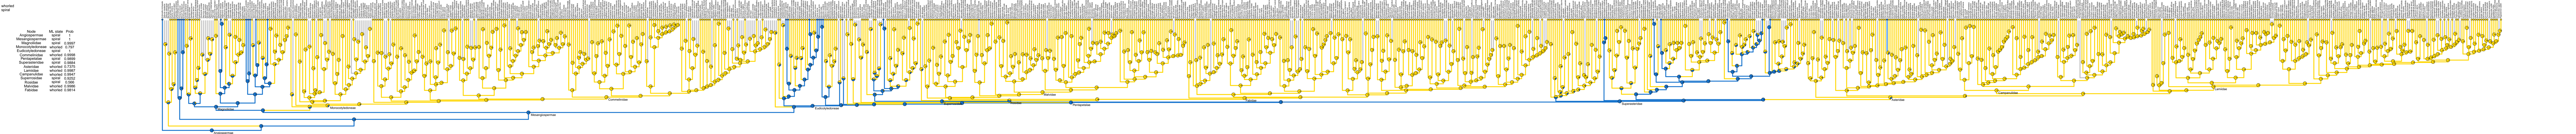



ML ancestral state reconstruction using rayDISC (R:corHMM)  
 231\_A. Number of perianth whorls (D2c), ARD model

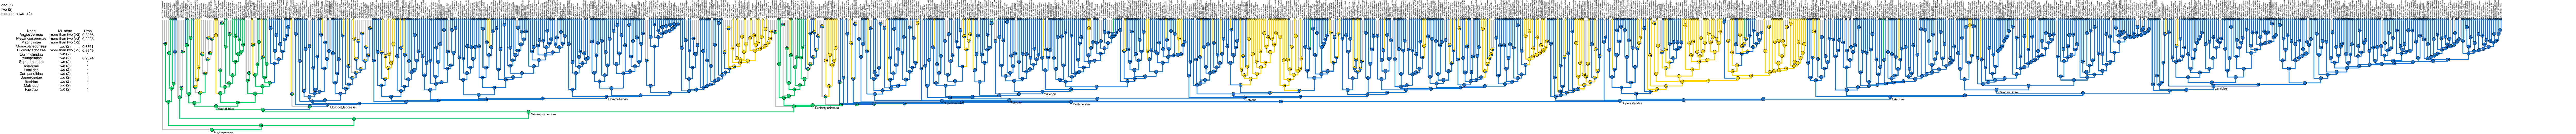

ML ancestral state reconstruction using rayDISC (R:corHMM)  
 231\_A. Number of perianth whorls (D2c), ER model

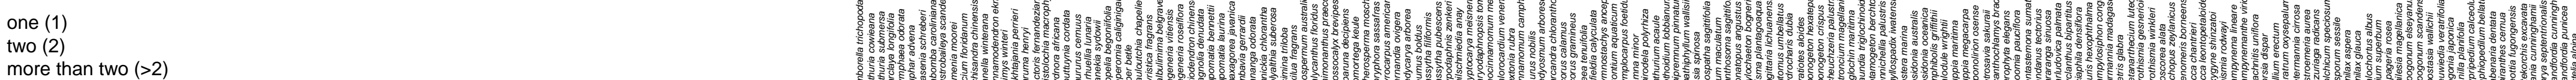

| Node             | ML state | Prob   |
|------------------|----------|--------|
| Angiospermae     | two (2)  | 0.8534 |
| Mesangiospermae  | two (2)  | 0.937  |
| Magnoliidae      | two (2)  | 0.8258 |
| Monocotyledoneae | two (2)  | 0.9982 |
| Eudicotyledoneae | two (2)  | 0.9414 |
| Commelinidae     | two (2)  | 1      |
| Pentapetalae     | two (2)  | 1      |
| Superasteridae   | two (2)  | 1      |
| Asteridae        | two (2)  | 1      |
| Lamiidae         | two (2)  | 1      |
| Campanulidae     | two (2)  | 1      |
| Superrosidae     | two (2)  | 1      |
| Rosidae          | two (2)  | 1      |
| Malvidae         | two (2)  | 1      |
| Fabidae          | two (2)  | 1      |

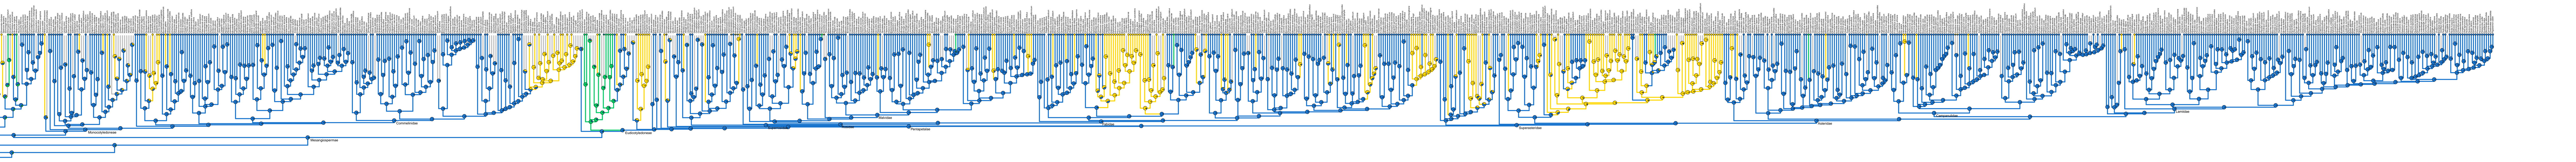

ML ancestral state reconstruction using rayDISC (R:corHMM)  
232\_A. Perianth merism (4–state) (D2c), ARD model

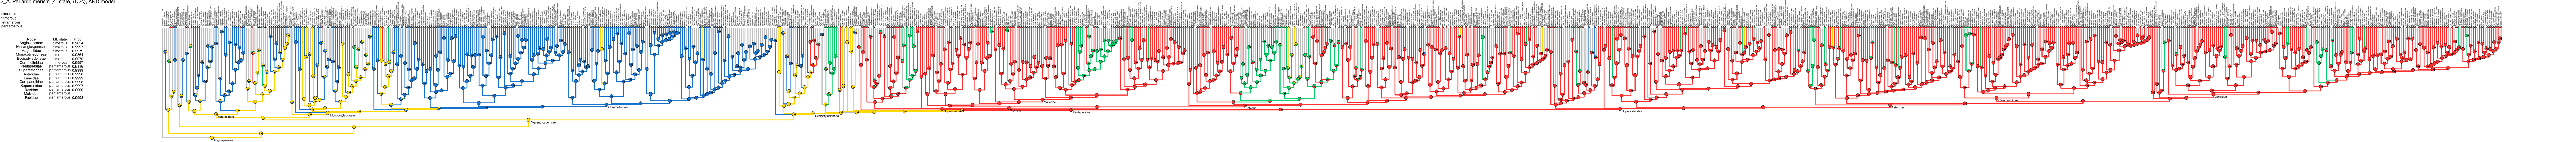

ML ancestral state reconstruction using rayDISC (R:corHMM)

232\_A. Perianth merism (4–state) (D2c), ER model

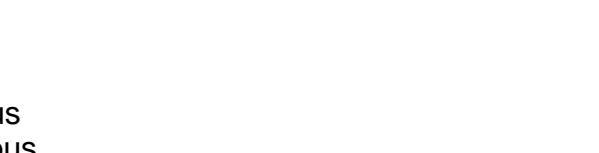

| Node             | ML state    | Prob   |
|------------------|-------------|--------|
| Angiospermae     | trimerous   | 0.9618 |
| Mesangiospermae  | trimerous   | 0.987  |
| Magnoliidae      | trimerous   | 1      |
| Monocotyledoneae | trimerous   | 1      |
| Eudicotyledoneae | trimerous   | 0.8384 |
| Commelinidae     | trimerous   | 1      |
| Pentapetalae     | pentamerous | 0.9912 |
| Superasteridae   | pentamerous | 1      |
| Asteridae        | pentamerous | 1      |
| Lamiidae         | pentamerous | 1      |
| Campanulidae     | pentamerous | 1      |
| Superrosidae     | pentamerous | 1      |
| Rosidae          | pentamerous | 1      |
| Malvidae         | pentamerous | 1      |
| Fabidae          | pentamerous | 1      |

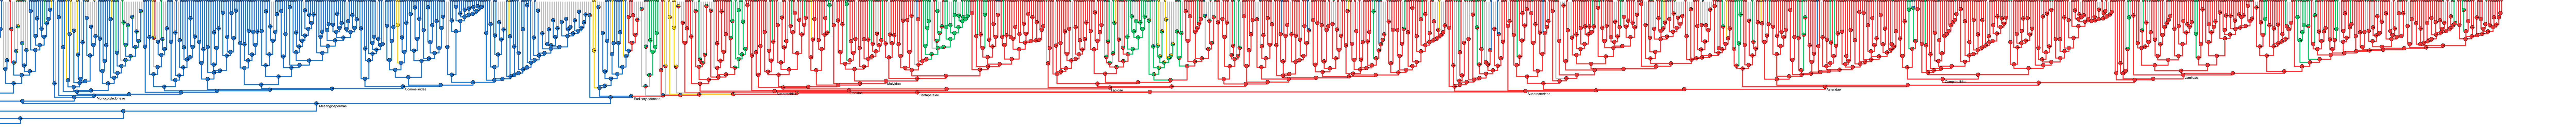

ML ancestral state reconstruction using rayDISC (R:corHMM)  
234\_B. Perianth differentiation (binary) (D2d), ARD model

● undifferentiated  
● differentiated

| Node             | ML state         | Prob   |
|------------------|------------------|--------|
| Angiospermae     | undifferentiated | 0.9853 |
| Mesangiospermae  | undifferentiated | 0.9969 |
| Magnoliidae      | undifferentiated | 0.9979 |
| Monocotyledoneae | undifferentiated | 0.9999 |
| Eudicotyledoneae | undifferentiated | 0.9269 |
| Commelinidae     | undifferentiated | 0.9999 |
| Pentapetalae     | undifferentiated | 0.5467 |
| Superasteridae   | differentiated   | 0.5039 |
| Asteridae        | differentiated   | 0.9274 |
| Lamiidae         | differentiated   | 0.9999 |
| Campanulidae     | differentiated   | 0.9999 |
| Superrosidae     | differentiated   | 0.7821 |
| Rosidae          | differentiated   | 0.8547 |
| Malvidae         | differentiated   | 0.998  |
| Fabidae          | differentiated   | 0.9304 |

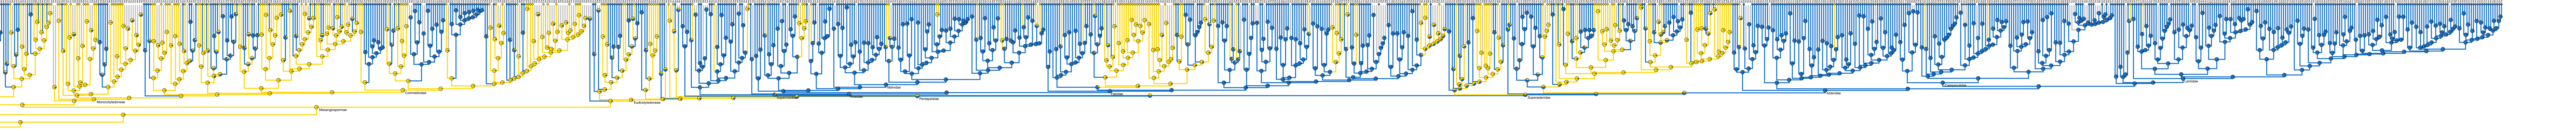



ML ancestral state reconstruction using rayDISC (R:corHMM)

301\_B. Number of fertile stamens (3-state) (D2c), ARD model

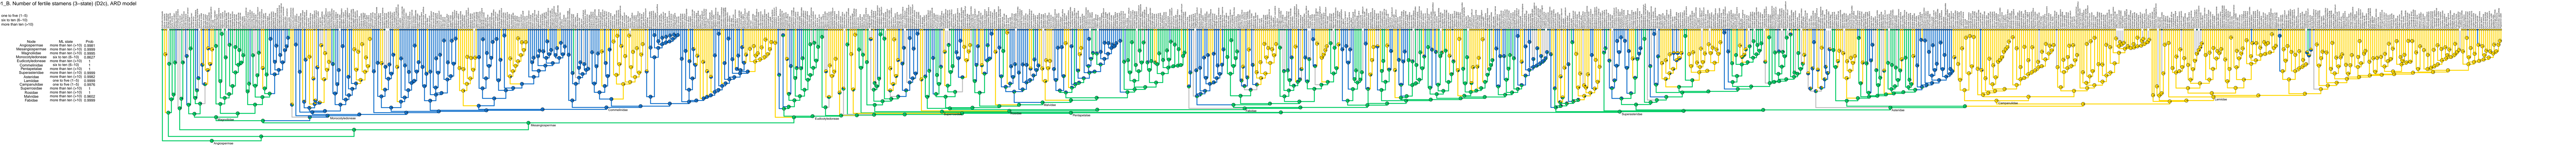

ML ancestral state reconstruction using rayDISC (R:corHMM)

301\_B. Number of fertile stamens (3-state) (D2c), ER model

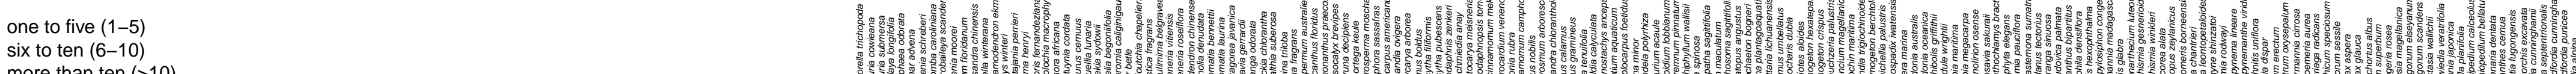

| Node             | ML state            | Prob   |
|------------------|---------------------|--------|
| Angiospermae     | more than ten (>10) | 0.7003 |
| Mesangiospermae  | more than ten (>10) | 0.505  |
| Magnoliidae      | more than ten (>10) | 0.6221 |
| Monocotyledoneae | six to ten (6-10)   | 0.9349 |
| Eudicotyledoneae | one to five (1-5)   | 0.8217 |
| Commelinidae     | six to ten (6-10)   | 0.9525 |
| Pentapetalae     | one to five (1-5)   | 0.9384 |
| Superasteridae   | one to five (1-5)   | 0.9385 |
| Asteridae        | one to five (1-5)   | 0.9997 |
| Lamiidae         | one to five (1-5)   | 1      |
| Campanulidae     | one to five (1-5)   | 1      |
| Superrosidae     | one to five (1-5)   | 0.9906 |
| Rosidae          | one to five (1-5)   | 0.9448 |
| Malvidae         | one to five (1-5)   | 0.9891 |
| Fabidae          | six to ten (6-10)   | 0.6234 |

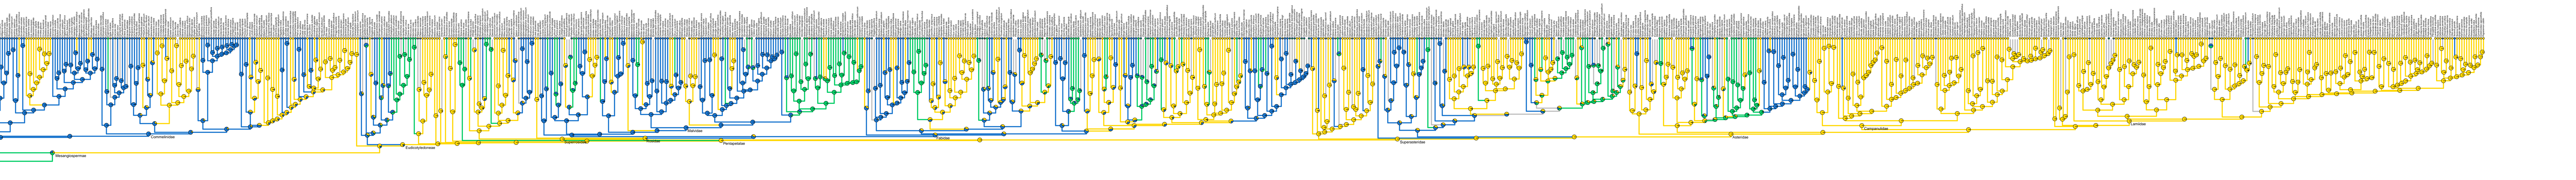

ML ancestral state reconstruction using rayDISC (R:corHMM)

305\_A. Filament (binary) (D2d), ARD model

● laminar (wide)  
● typical (narrow)

| Node             | ML state         | Prob   |
|------------------|------------------|--------|
| Angiospermae     | laminar (wide)   | 0.9775 |
| Mesangiospermae  | laminar (wide)   | 0.9887 |
| Magnoliidae      | laminar (wide)   | 0.9995 |
| Monocotyledoneae | laminar (wide)   | 0.9812 |
| Eudicotyledoneae | typical (narrow) | 0.5408 |
| Commelinidae     | laminar (wide)   | 0.7714 |
| Pentapetalae     | typical (narrow) | 0.9306 |
| Superasteridae   | typical (narrow) | 0.9995 |
| Asteridae        | typical (narrow) | 0.9996 |
| Lamiidae         | typical (narrow) | 0.9999 |
| Campanulidae     | typical (narrow) | 0.9972 |
| Superrosidae     | typical (narrow) | 0.9996 |
| Rosidae          | typical (narrow) | 0.9998 |
| Malvidae         | typical (narrow) | 0.9999 |
| Fabidae          | typical (narrow) | 0.9999 |

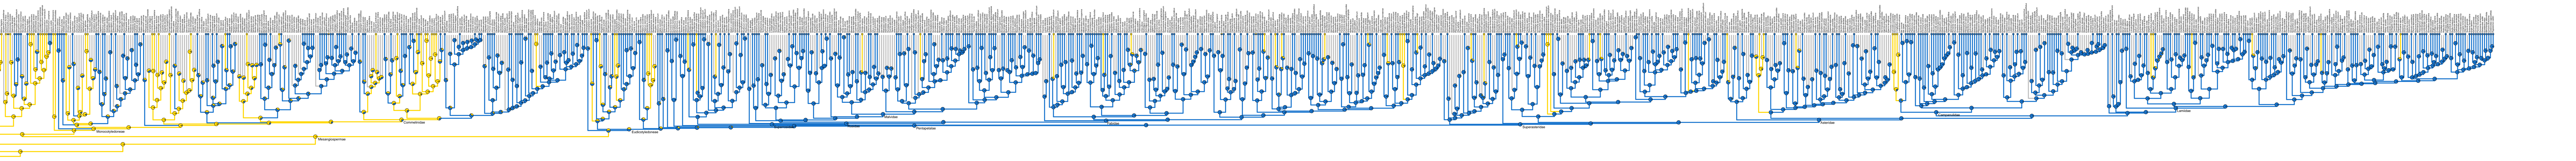

ML ancestral state reconstruction using rayDISC (R:corHMM)

305\_A. Filament (binary) (D2d), ER model

● laminar (wide)  
● typical (narrow)

| Node             | ML state         | Prob   |
|------------------|------------------|--------|
| Angiospermae     | typical (narrow) | 0.9281 |
| Mesangiospermae  | typical (narrow) | 0.9914 |
| Magnoliidae      | typical (narrow) | 0.9253 |
| Monocotyledoneae | typical (narrow) | 0.9983 |
| Eudicotyledoneae | typical (narrow) | 1      |
| Commelinidae     | typical (narrow) | 1      |
| Pentapetalae     | typical (narrow) | 1      |
| Superasteridae   | typical (narrow) | 1      |
| Asteridae        | typical (narrow) | 1      |
| Lamiidae         | typical (narrow) | 1      |
| Campanulidae     | typical (narrow) | 1      |
| Superrosidae     | typical (narrow) | 0.9999 |
| Rosidae          | typical (narrow) | 1      |
| Malvidae         | typical (narrow) | 1      |
| Fabidae          | typical (narrow) | 1      |

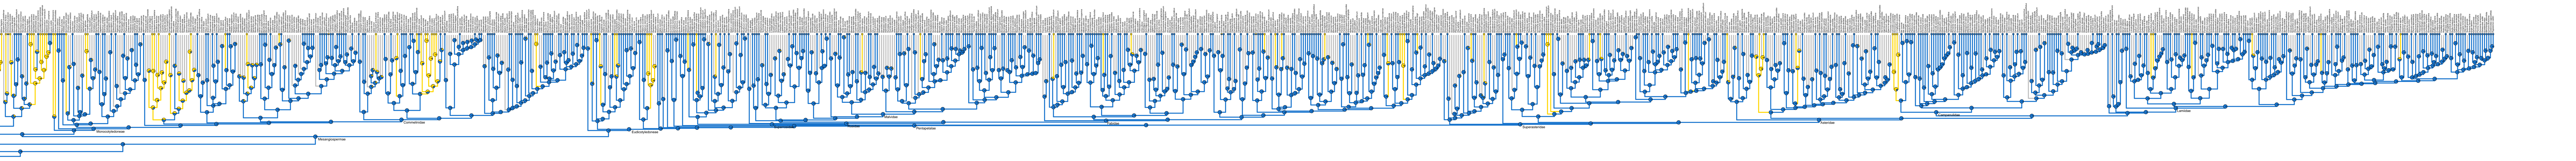

ML ancestral state reconstruction using rayDISC (R:corHMM)

306\_A. Fusion of filaments (binary) (D2c), ARD model

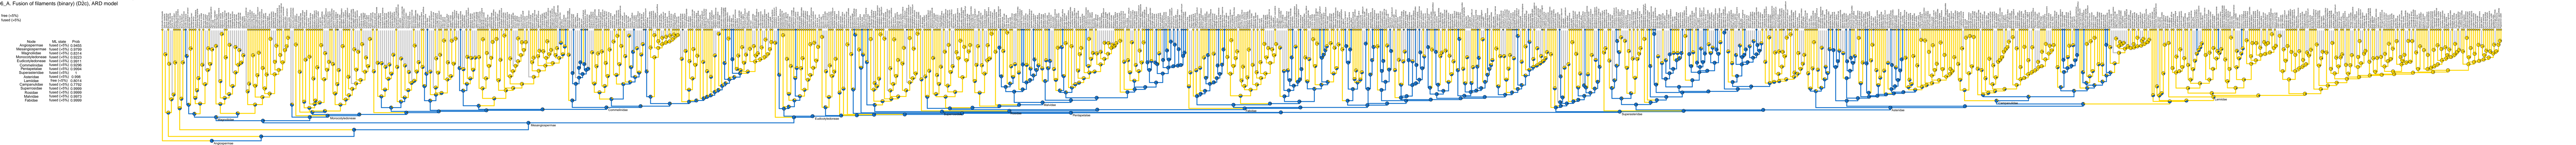

ML ancestral state reconstruction using rayDISC (R:corHMM)  
 306\_A. Fusion of filaments (binary) (D2c), ER model

● free (<5%)  
 ● fused (>5%)

| Node             | ML state   | Prob   |
|------------------|------------|--------|
| Angiospermae     | free (<5%) | 0.9949 |
| Mesangiospermae  | free (<5%) | 1      |
| Magnoliidae      | free (<5%) | 1      |
| Monocotyledoneae | free (<5%) | 1      |
| Eudicotyledoneae | free (<5%) | 1      |
| Commelinidae     | free (<5%) | 0.9999 |
| Pentapetalae     | free (<5%) | 1      |
| Superasteridae   | free (<5%) | 1      |
| Asteridae        | free (<5%) | 1      |
| Lamiidae         | free (<5%) | 1      |
| Campanulidae     | free (<5%) | 1      |
| Superrosidae     | free (<5%) | 1      |
| Rosidae          | free (<5%) | 1      |
| Malvidae         | free (<5%) | 1      |
| Fabidae          | free (<5%) | 1      |

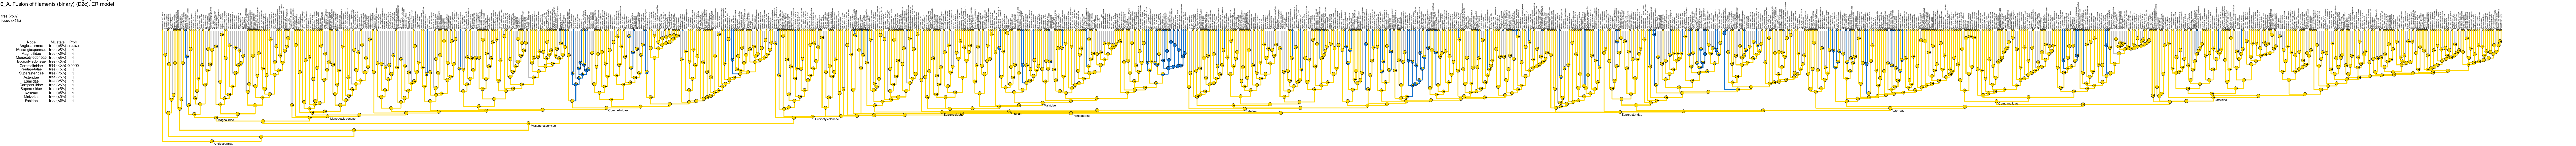

ML ancestral state reconstruction using rayDISC (R:corHMM)  
 308\_A. Fusion of filaments to inner perianth series (binary) (D2c), ARD model

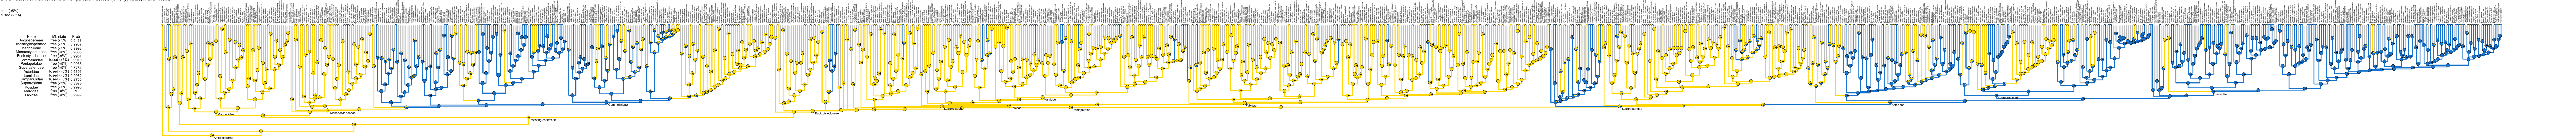

ML ancestral state reconstruction using rayDISC (R:corHMM)  
 308\_A. Fusion of filaments to inner perianth series (binary) (D2c), ER model

● free (<5%)  
 ● fused (>5%)

| Node             | ML state    | Prob   |
|------------------|-------------|--------|
| Angiospermae     | free (<5%)  | 0.9894 |
| Mesangiospermae  | free (<5%)  | 1      |
| Magnoliidae      | free (<5%)  | 1      |
| Monocotyledoneae | free (<5%)  | 0.9996 |
| Eudicotyledoneae | free (<5%)  | 1      |
| Commelinidae     | free (<5%)  | 0.8493 |
| Pentapetalae     | free (<5%)  | 0.9999 |
| Superasteridae   | free (<5%)  | 0.9948 |
| Asteridae        | fused (>5%) | 0.7084 |
| Lamiidae         | free (<5%)  | 0.9927 |
| Campanulidae     | free (<5%)  | 1      |
| Superrosidae     | free (<5%)  | 1      |
| Rosidae          | free (<5%)  | 1      |
| Malvidae         | free (<5%)  | 1      |
| Fabidae          | free (<5%)  | 0.9999 |

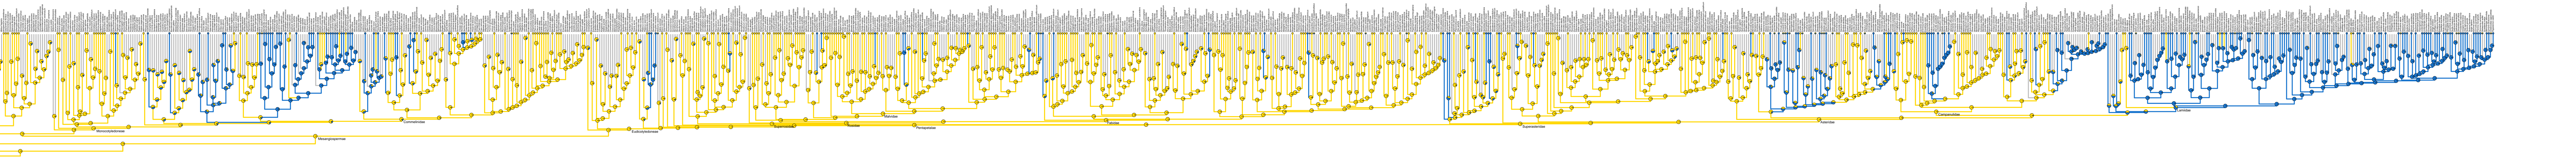

ML ancestral state reconstruction using rayDISC (R:corHMM)

311\_A. Anther orientation (D2d), ARD model

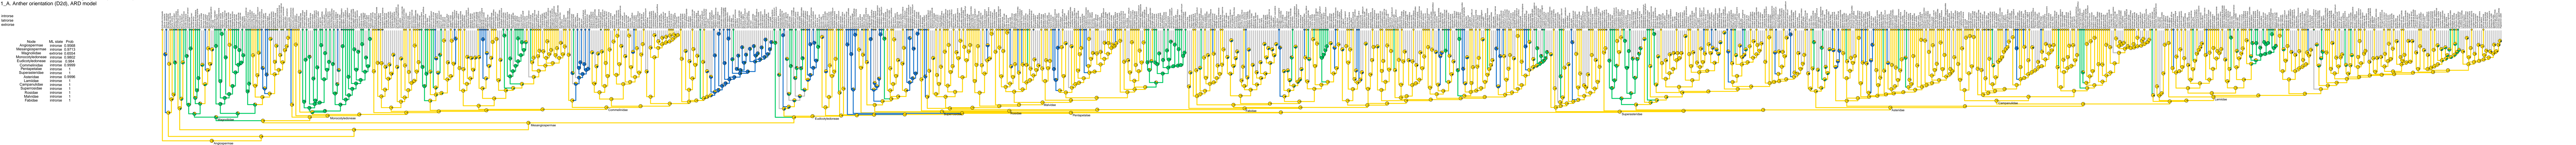

ML ancestral state reconstruction using rayDISC (R:corHMM)

311\_A. Anther orientation (D2d), ER model

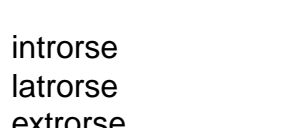

| Node             | ML state | Prob   |
|------------------|----------|--------|
| Angiospermae     | introrse | 0.8639 |
| Mesangiospermae  | introrse | 0.8614 |
| Magnoliidae      | extorse  | 0.7786 |
| Monocotyledoneae | introrse | 0.8943 |
| Eudicotyledoneae | introrse | 0.8764 |
| Commelinidae     | introrse | 0.9998 |
| Pentapetalae     | introrse | 0.9994 |
| Superasteridae   | introrse | 0.9998 |
| Asteridae        | introrse | 0.9998 |
| Lamiidae         | introrse | 1      |
| Campanulidae     | introrse | 1      |
| Superrosidae     | introrse | 1      |
| Rosidae          | introrse | 1      |
| Malvidae         | introrse | 1      |
| Fabidae          | introrse | 1      |

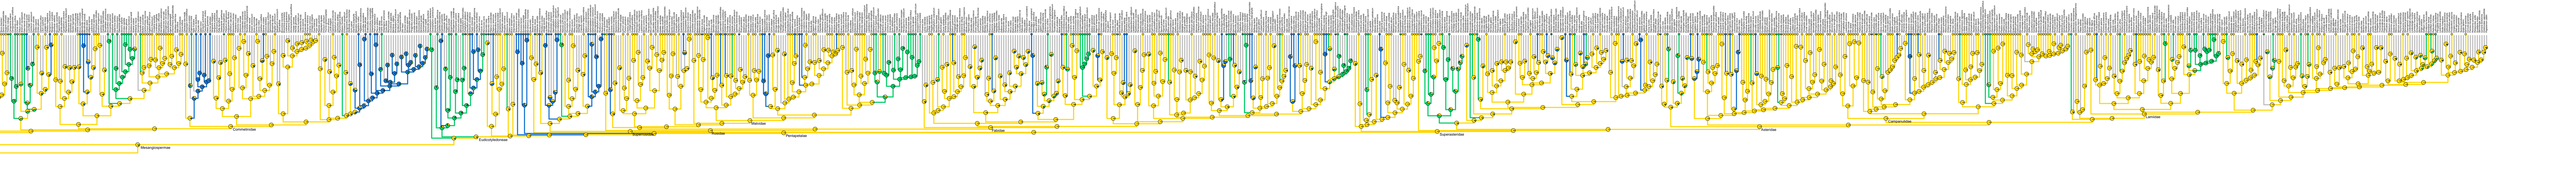

ML ancestral state reconstruction using rayDISC (R:corHMM)  
312\_A. Anther attachment (binary) (D2d), ARD model

● basifixed  
● dorsifixed

| Node             | ML state  | Prob   |
|------------------|-----------|--------|
| Angiospermae     | basifixed | 0.5    |
| Mesangiospermae  | basifixed | 0.5466 |
| Magnoliidae      | basifixed | 0.5466 |
| Monocotyledoneae | basifixed | 0.5466 |
| Eudicotyledoneae | basifixed | 0.5466 |
| Commelinidae     | basifixed | 0.5466 |
| Pentapetalae     | basifixed | 0.5466 |
| Superasteridae   | basifixed | 0.5466 |
| Asteridae        | basifixed | 0.5466 |
| Lamiidae         | basifixed | 0.5466 |
| Campanulidae     | basifixed | 0.5466 |
| Superrosidae     | basifixed | 0.5466 |
| Rosidae          | basifixed | 0.5466 |
| Malvidae         | basifixed | 0.5466 |
| Fabidae          | basifixed | 0.5466 |

Angiospermae

Magnoliidae

Monocotyledoneae

Mesangiospermae

Commelinidae

Eudicotyledoneae

Superrosidae

Rosidae

Pentapetalae

Fabidae

Malvidae

Superasteridae

Asteridae

Campanulidae

Lamiidae

ML ancestral state reconstruction using rayDISC (R:corHMM)  
312\_A. Anther attachment (binary) (D2d), ER model

● basifixed  
● dorsifixed

| Node             | ML state  | Prob |
|------------------|-----------|------|
| Angiospermae     | basifixed | 0.5  |
| Mesangiospermae  | basifixed | 0.5  |
| Magnoliidae      | basifixed | 0.5  |
| Monocotyledoneae | basifixed | 0.5  |
| Eudicotyledoneae | basifixed | 0.5  |
| Commelinidae     | basifixed | 0.5  |
| Pentapetalae     | basifixed | 0.5  |
| Superasteridae   | basifixed | 0.5  |
| Asteridae        | basifixed | 0.5  |
| Lamiidae         | basifixed | 0.5  |
| Campanulidae     | basifixed | 0.5  |
| Superrosidae     | basifixed | 0.5  |
| Rosidae          | basifixed | 0.5  |
| Malvidae         | basifixed | 0.5  |
| Fabidae          | basifixed | 0.5  |

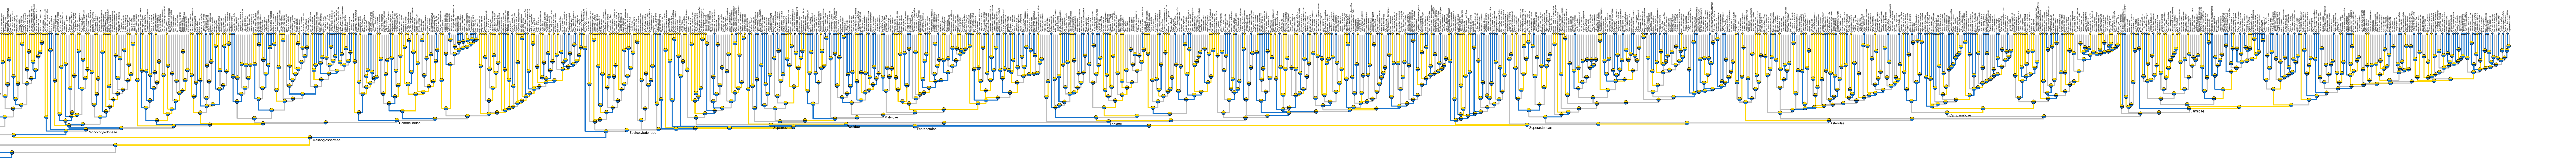

ML ancestral state reconstruction using rayDISC (R:corHMM)  
 313\_A. Anther dehiscence (3–state) (D2d), ARD model

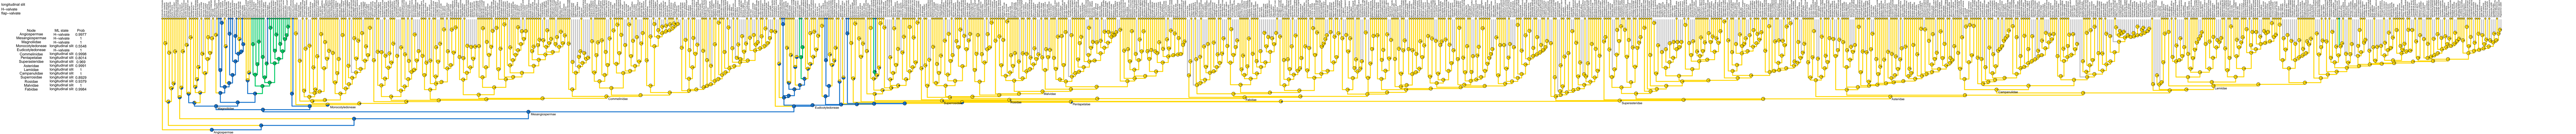

ML ancestral state reconstruction using rayDISC (R:corHMM)  
313\_A. Anther dehiscence (3-state) (D2d), ER model

- longitudinal slit  
● H-valvate  
● flap-valvate

| Node             | ML state          | Prob |
|------------------|-------------------|------|
| Angiospermae     | longitudinal slit | 1    |
| Mesangiospermae  | longitudinal slit | 1    |
| Magnoliidae      | longitudinal slit | 1    |
| Monocotyledoneae | longitudinal slit | 1    |
| Eudicotyledoneae | longitudinal slit | 1    |
| Commelinidae     | longitudinal slit | 1    |
| Pentapetalae     | longitudinal slit | 1    |
| Superasteridae   | longitudinal slit | 1    |
| Asteridae        | longitudinal slit | 1    |
| Lamiidae         | longitudinal slit | 1    |
| Campanulidae     | longitudinal slit | 1    |
| Superrosidae     | longitudinal slit | 1    |
| Rosidae          | longitudinal slit | 1    |
| Malvidae         | longitudinal slit | 1    |
| Fabidae          | longitudinal slit | 1    |

Magnoliidae

Monocotyledoneae

Commelinidae

Eudicotyledoneae

Superrosidae

Rosidae

Pentapetalae

Fabidae

Superasteridae

Asteridae

Campanulidae

Lamiidae

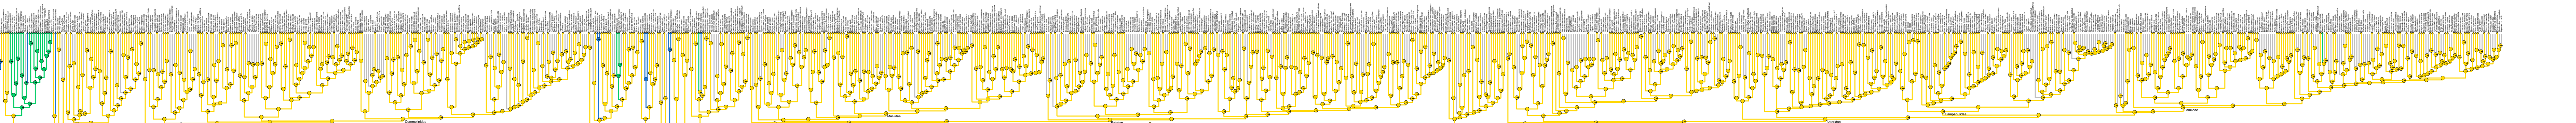

ML ancestral state reconstruction using rayDISC (R:corHMM)  
 314\_A. Connective extension (apical) (D2d), ARD model

● absent  
 ● present

| Node             | ML state | Prob   |
|------------------|----------|--------|
| Angiospermae     | absent   | 0.7648 |
| Mesangiospermae  | absent   | 0.8673 |
| Magnoliidae      | present  | 0.5222 |
| Monocotyledoneae | absent   | 0.9511 |
| Eudicotyledoneae | absent   | 0.9339 |
| Commelinidae     | absent   | 1      |
| Pentapetalae     | absent   | 0.9925 |
| Superasteridae   | absent   | 0.9999 |
| Asteridae        | absent   | 0.9999 |
| Lamiidae         | absent   | 0.9999 |
| Campanulidae     | absent   | 1      |
| Superrosidae     | absent   | 0.9994 |
| Rosidae          | absent   | 0.9996 |
| Malvidae         | absent   | 0.9999 |
| Fabidae          | absent   | 0.9999 |

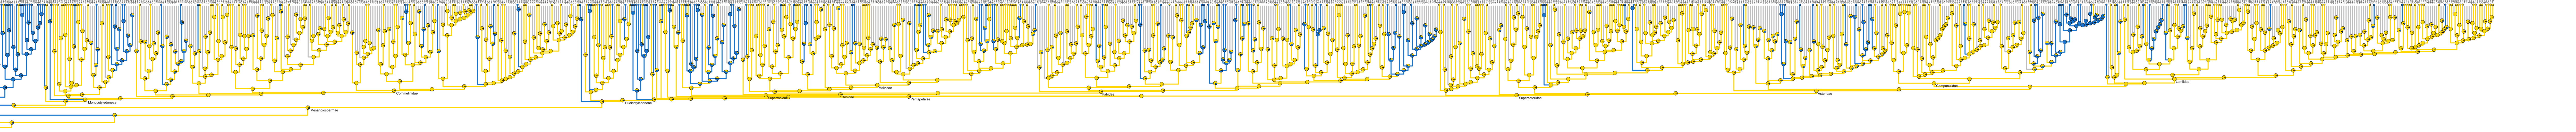

ML ancestral state reconstruction using rayDISC (R:corHMM)  
314\_A. Connective extension (apical) (D2d), ER model

● absent  
● present

| Node             | ML state | Prob   |
|------------------|----------|--------|
| Angiospermae     | absent   | 0.592  |
| Mesangiospermae  | absent   | 0.6958 |
| Magnoliidae      | present  | 0.6676 |
| Monocotyledoneae | absent   | 0.8838 |
| Eudicotyledoneae | absent   | 0.8109 |
| Commelinidae     | absent   | 0.9999 |
| Pentapetalae     | absent   | 0.9721 |
| Superasteridae   | absent   | 0.9998 |
| Asteridae        | absent   | 0.9998 |
| Lamiidae         | absent   | 0.9998 |
| Campanulidae     | absent   | 0.9999 |
| Superrosidae     | absent   | 0.9971 |
| Rosidae          | absent   | 0.9981 |
| Malvidae         | absent   | 0.9999 |
| Fabidae          | absent   | 0.9997 |

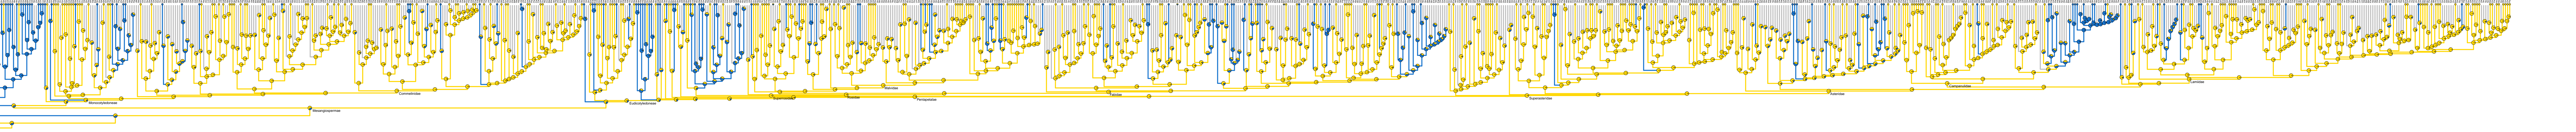

ML ancestral state reconstruction using rayDISC (R:corHMM)

330\_A. Androecium structural phyllotaxy (binary) (D2d), ARD model

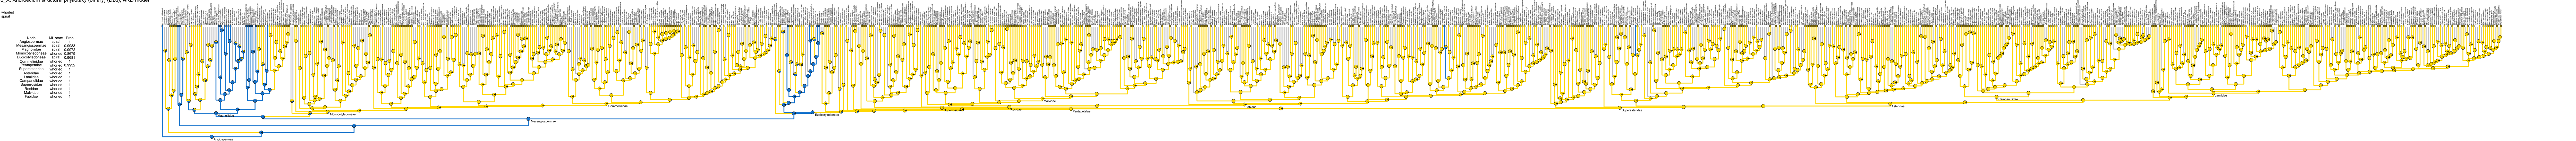

ML ancestral state reconstruction using rayDISC (R:corHMM)  
330\_A. Androecium structural phyllotaxy (binary) (D2d), ER model

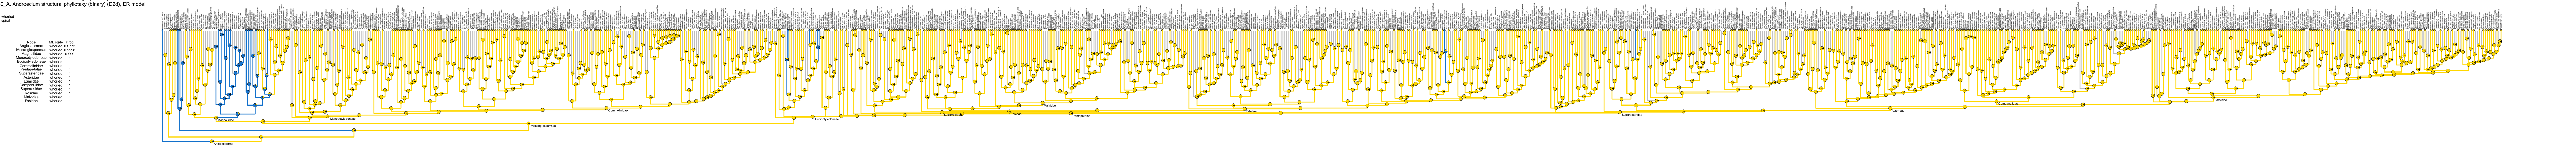

ML ancestral state reconstruction using rayDISC (R:corHMM)

331\_A. Number of androecium structural whorls (3-state) (D2c), ARD model

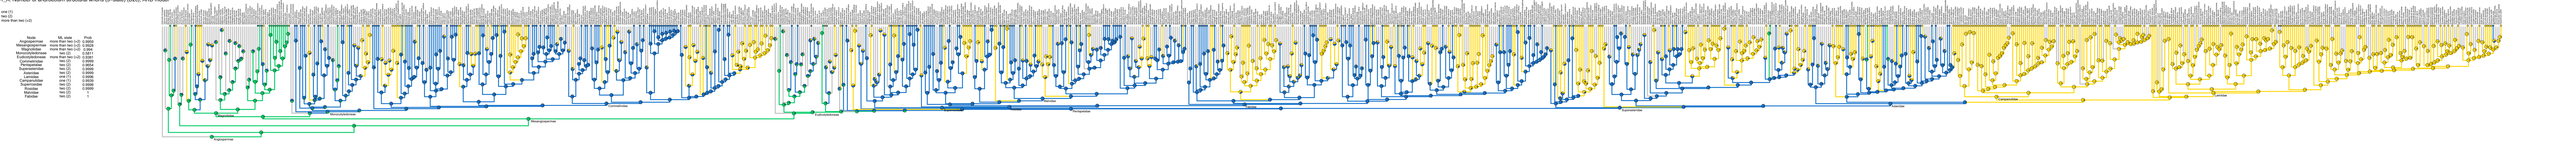

ML ancestral state reconstruction using rayDISC (R:corHMM)

331\_A. Number of androecium structural whorls (3-state) (D2c), ER model

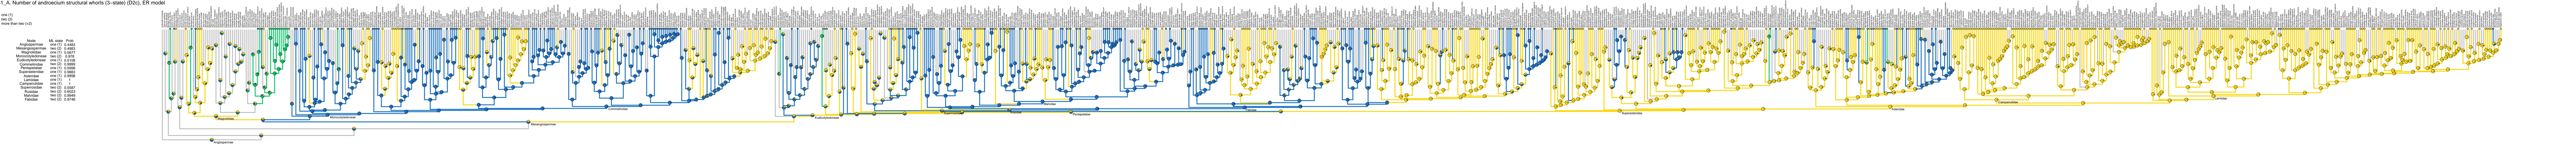

ML ancestral state reconstruction using rayDISC (R:corHMM)

332\_A. Androecium structural merism (4-state) (D2c), ARD model

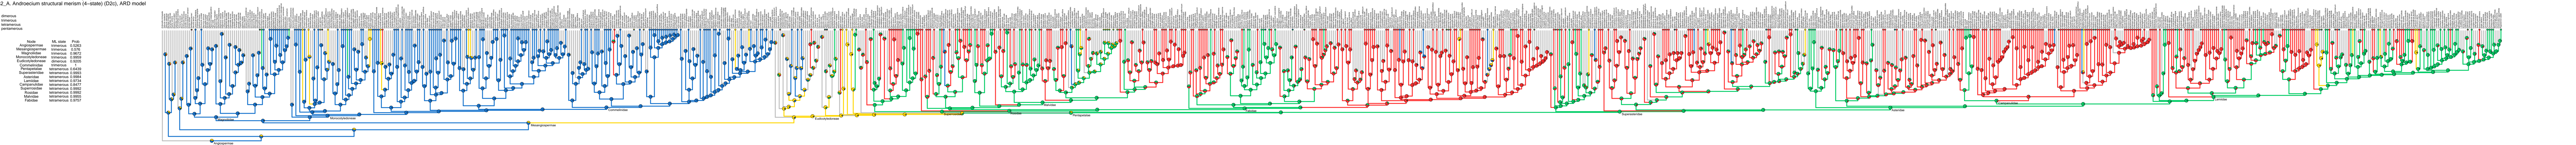

ML ancestral state reconstruction using rayDISC (R:corHMM)

332\_A. Androecium structural merism (4-state) (D2c), ER model

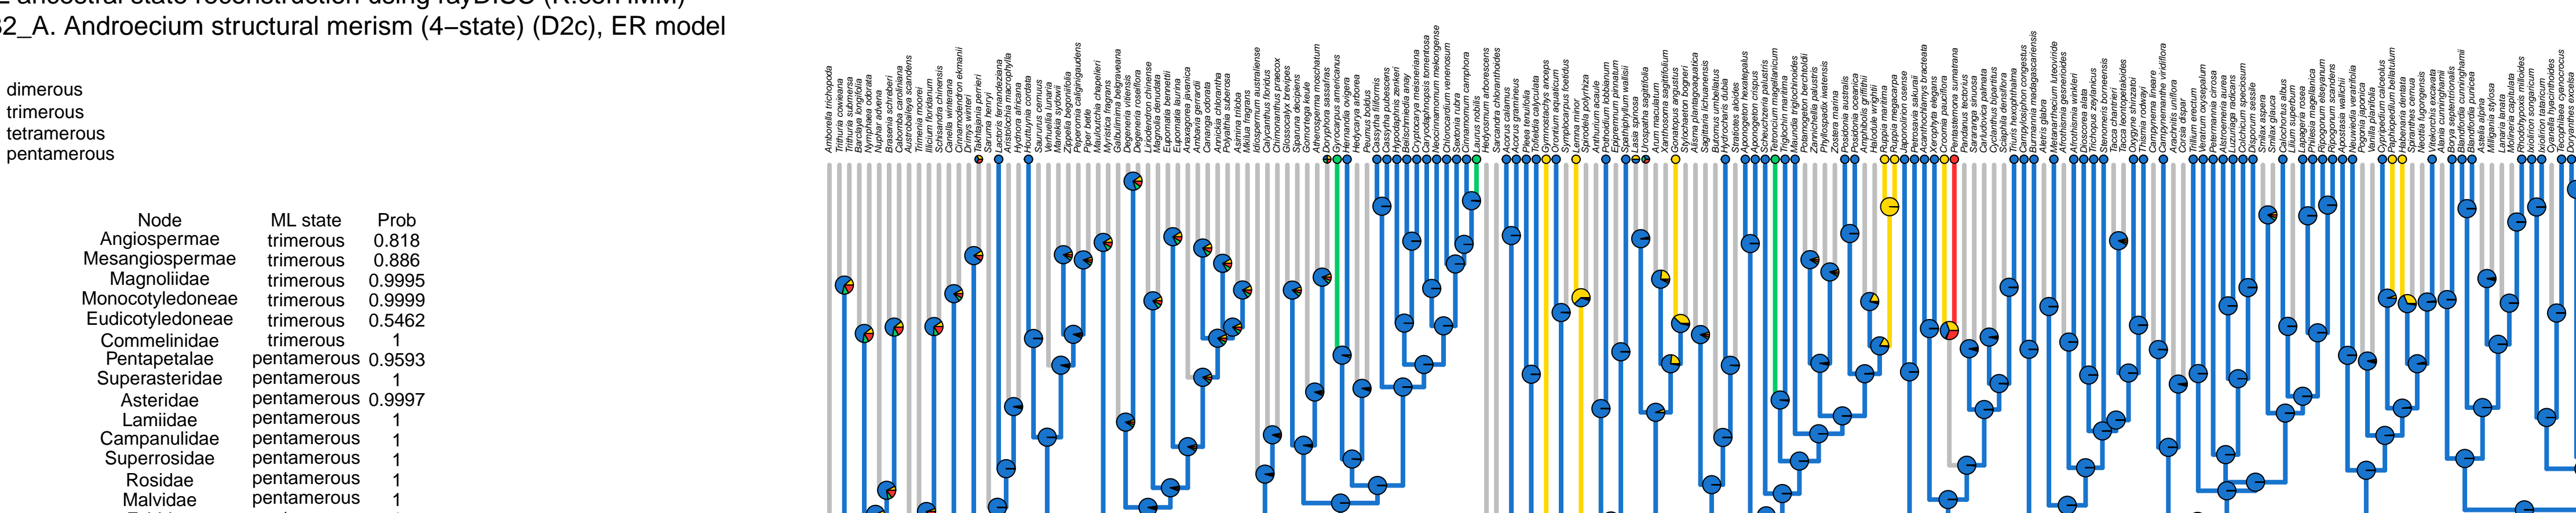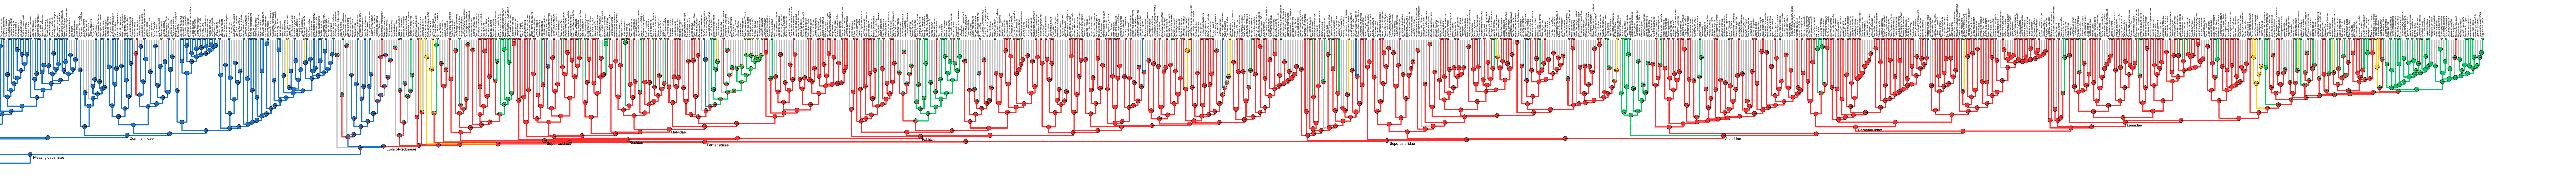

ML ancestral state reconstruction using rayDISC (R:corHMM)

400\_A. Gynoecium phyllotaxy (D2d), ARD model

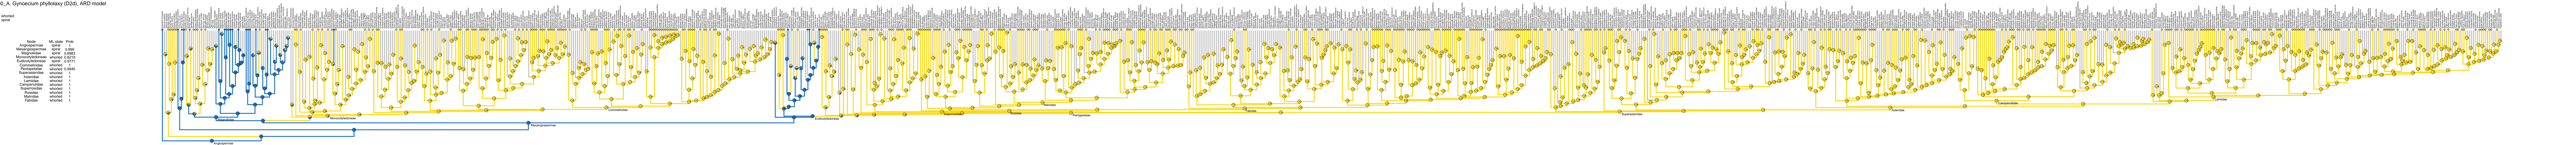

ML ancestral state reconstruction using rayDISC (R:corHMM)  
400\_A. Gynoecium phyllotaxy (D2d), ER model

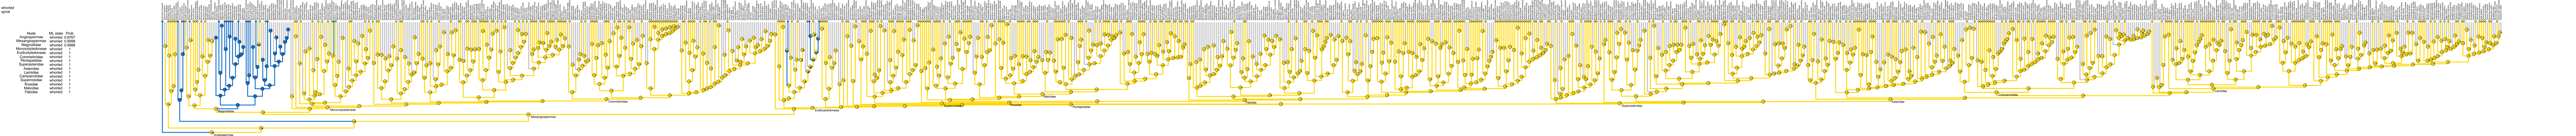

# ML ancestral state reconstruction using rayDISC (R:corHMM)

401\_B. Number of structural carpels (5-state) (D2c), ARD model

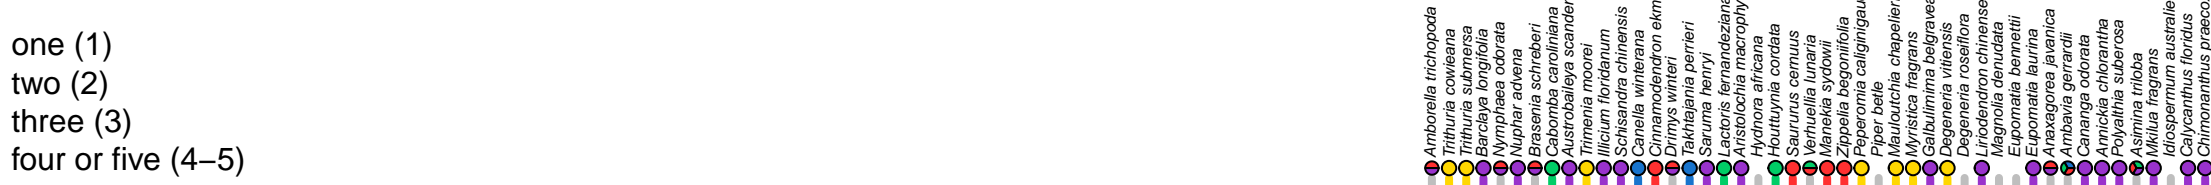

| Node             | ML state            | Prob   |
|------------------|---------------------|--------|
| Angiospermae     | more than five (>5) | 0.9934 |
| Mesangiospermae  | more than five (>5) | 0.9998 |
| Magnoliidae      | more than five (>5) | 0.9995 |
| Monocotyledoneae | more than five (>5) | 0.8429 |
| Eudicotyledoneae | more than five (>5) | 0.9917 |
| Commelinidae     | three (3)           | 1      |
| Pentapetalae     | four or five (4-5)  | 0.9729 |
| Superasteridae   | four or five (4-5)  | 0.9599 |
| Asteridae        | four or five (4-5)  | 0.9971 |
| Lamiidae         | two (2)             | 0.9878 |
| Campanulidae     | four or five (4-5)  | 0.6447 |
| Superrosidae     | four or five (4-5)  | 1      |
| Rosidae          | four or five (4-5)  | 1      |
| Malvidae         | four or five (4-5)  | 1      |
| Fabidae          | four or five (4-5)  | 1      |

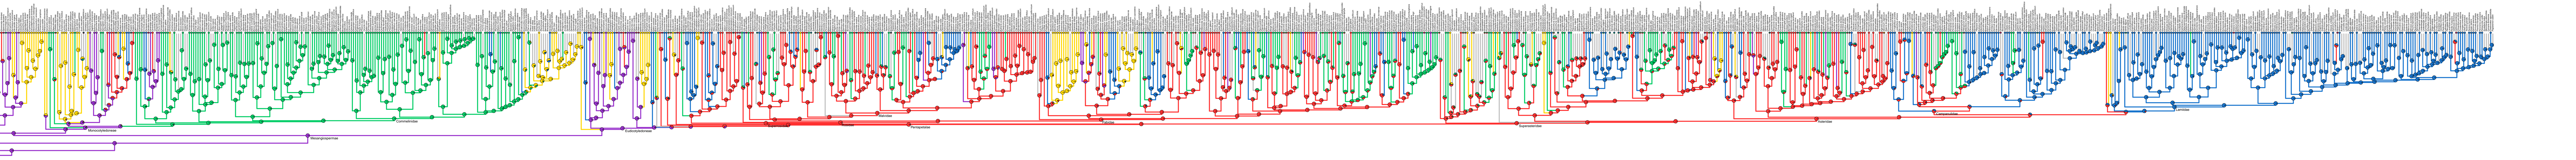

ML ancestral state reconstruction using rayDISC (R:corHMM)

401\_B. Number of structural carpels (5-state) (D2c), ER model

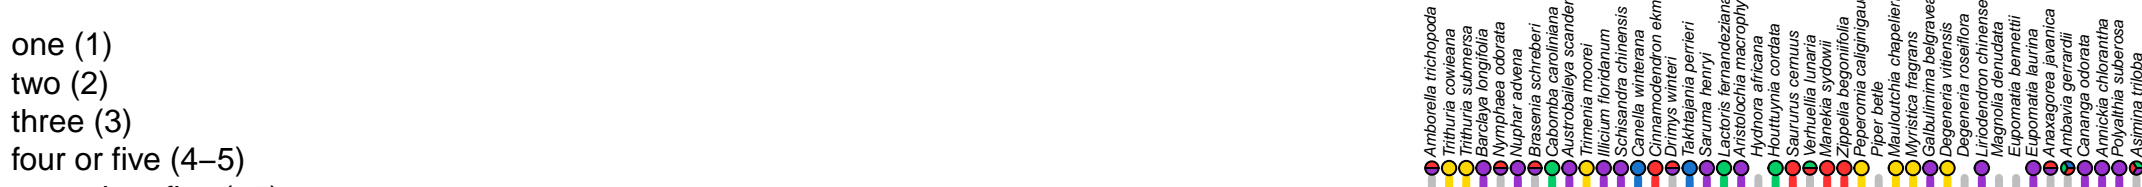

| Node             | ML state            | Prob   |
|------------------|---------------------|--------|
| Angiospermae     | more than five (>5) | 0.973  |
| Mesangiospermae  | more than five (>5) | 0.9946 |
| Magnoliidae      | more than five (>5) | 0.9968 |
| Monocotyledoneae | three (3)           | 0.8783 |
| Eudicotyledoneae | more than five (>5) | 0.9694 |
| Commelinidae     | three (3)           | 1      |
| Pentapetalae     | four or five (4-5)  | 0.7109 |
| Superasteridae   | three (3)           | 0.5978 |
| Asteridae        | two (2)             | 0.602  |
| Lamiidae         | two (2)             | 1      |
| Campanulidae     | two (2)             | 0.9993 |
| Superrosidae     | four or five (4-5)  | 0.7667 |
| Rosidae          | four or five (4-5)  | 0.7875 |
| Malvidae         | four or five (4-5)  | 0.9445 |
| Fabidae          | four or five (4-5)  | 0.9368 |

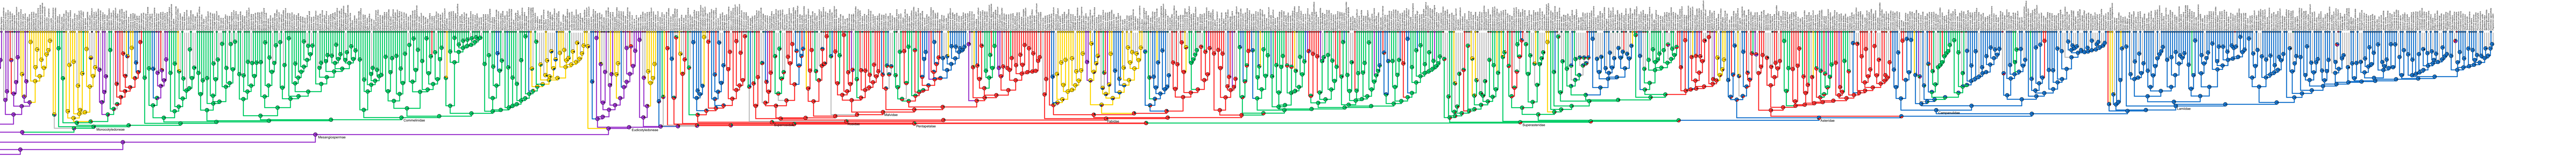

ML ancestral state reconstruction using rayDISC (R:corHMM)  
403\_A. Fusion of ovaries (binary) (D2c), ARD model

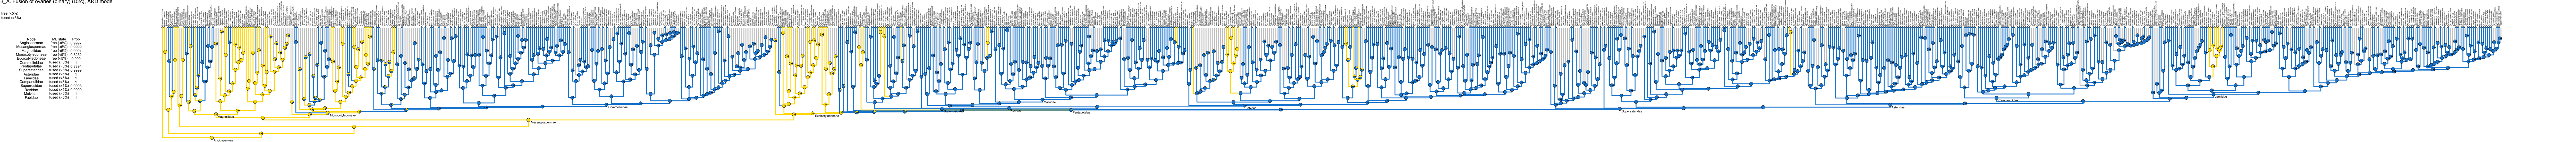



ML ancestral state reconstruction using rayDISC (R:corHMM)  
404\_B. Style differentiation (D2d), ARD model

● absent  
● present

| Node             | ML state | Prob   |
|------------------|----------|--------|
| Angiospermae     | absent   | 0.9971 |
| Mesangiospermae  | absent   | 0.9945 |
| Magnoliidae      | absent   | 0.9996 |
| Monocotyledoneae | absent   | 0.9745 |
| Eudicotyledoneae | present  | 0.6244 |
| Commelinidae     | present  | 0.948  |
| Pentapetalae     | present  | 0.9946 |
| Superasteridae   | present  | 0.9999 |
| Asteridae        | present  | 0.9998 |
| Lamiidae         | present  | 0.9998 |
| Campanulidae     | present  | 0.9996 |
| Superrosidae     | present  | 0.9996 |
| Rosidae          | present  | 0.9998 |
| Malvidae         | present  | 0.9998 |
| Fabidae          | present  | 1      |

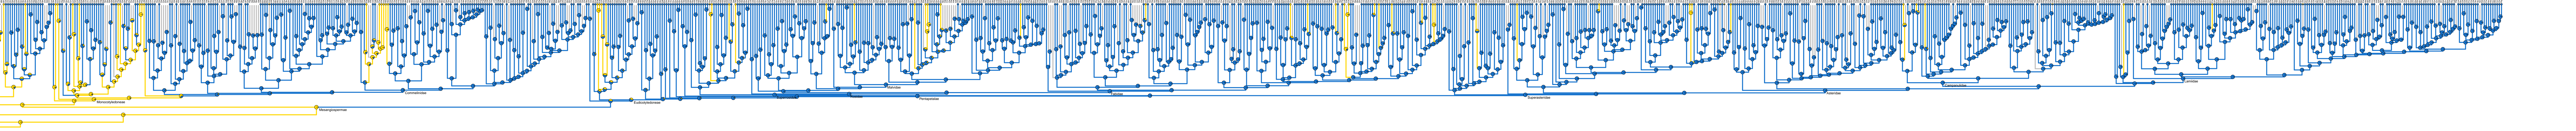

ML ancestral state reconstruction using rayDISC (R:corHMM)  
404\_B. Style differentiation (D2d), ER model

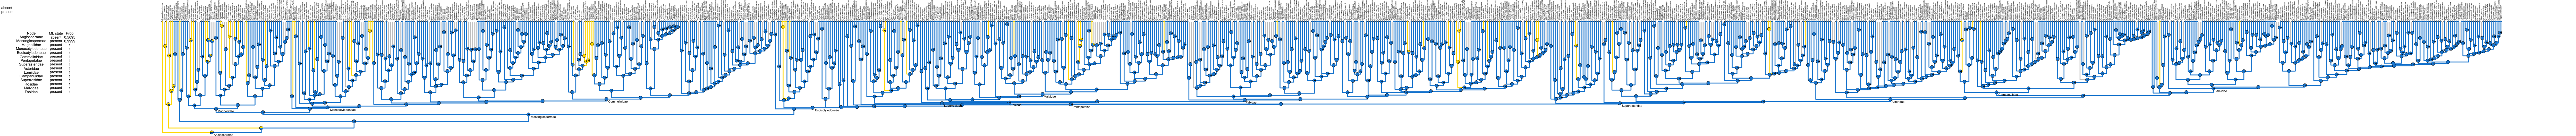

ML ancestral state reconstruction using rayDISC (R:corHMM)

406\_A. Fusion of styles (D2c), ARD model

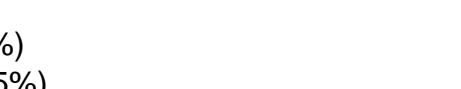

| Node             | ML state    | Prob   |
|------------------|-------------|--------|
| Angiospermae     | free (<5%)  | 0.9778 |
| Mesangiospermae  | free (<5%)  | 0.9999 |
| Magnoliidae      | free (<5%)  | 0.9993 |
| Monocotyledoneae | free (<5%)  | 0.9739 |
| Eudicotyledoneae | free (<5%)  | 1      |
| Commelinidae     | fused (>5%) | 0.9841 |
| Pentapetalae     | free (<5%)  | 0.9945 |
| Superasteridae   | free (<5%)  | 0.9284 |
| Asteridae        | fused (>5%) | 0.9156 |
| Lamiidae         | fused (>5%) | 0.9832 |
| Campanulidae     | fused (>5%) | 0.9806 |
| Superrosidae     | free (<5%)  | 0.9799 |
| Rosidae          | free (<5%)  | 0.9036 |
| Malvidae         | fused (>5%) | 0.9869 |
| Fabidae          | free (<5%)  | 0.8748 |

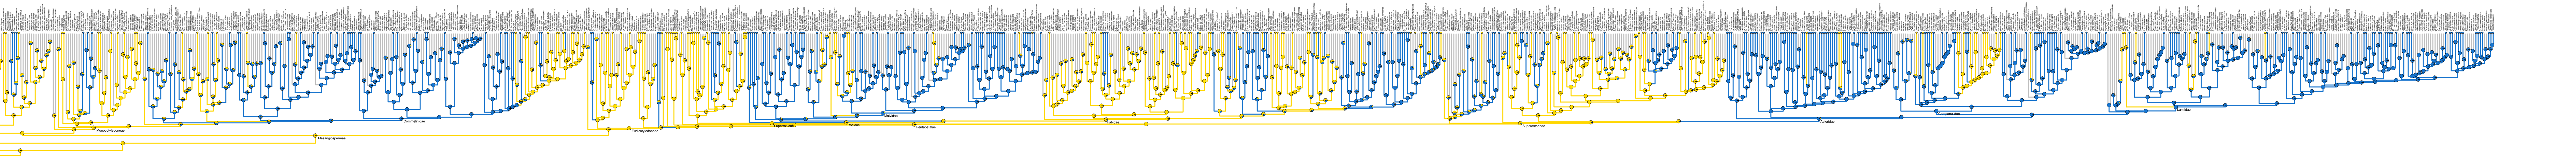

— ancestral state reconstruction using *rayDISC* (R:corHMM)

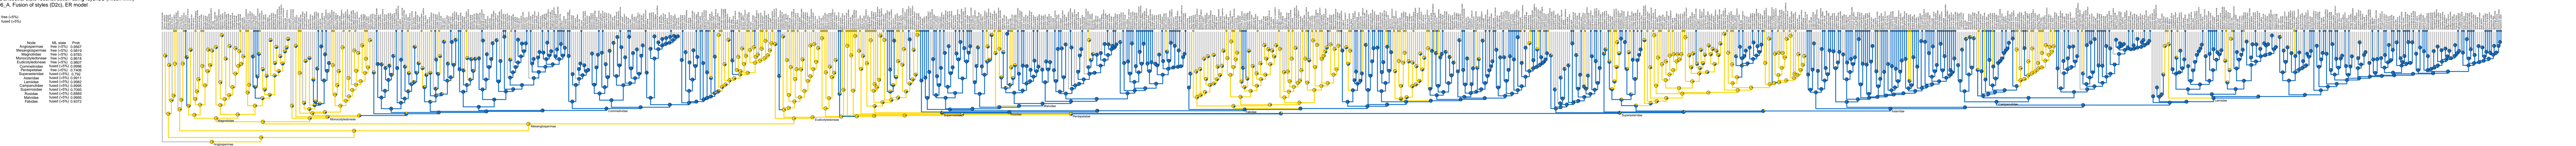

ML ancestral state reconstruction using rayDISC (R:corHMM)  
 411\_A. Number of ovules per functional carpel (3–state) (D2c), ARD model

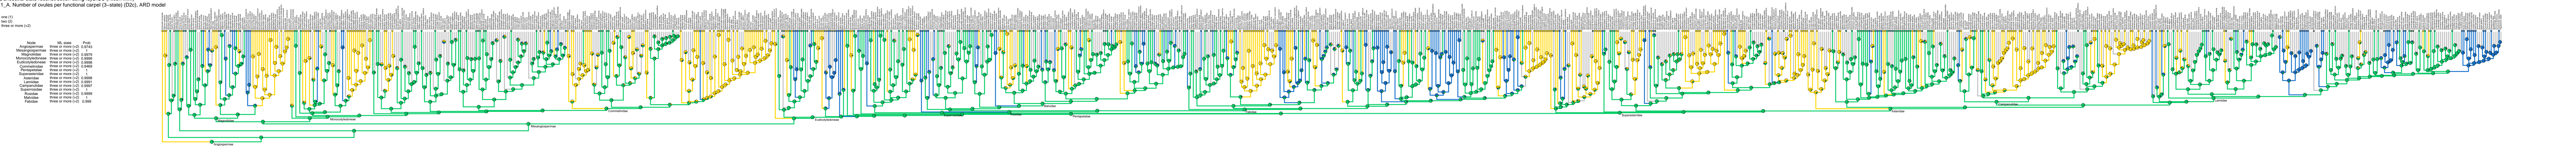

ML ancestral state reconstruction using rayDISC (R:corHMM)

411\_A. Number of ovules per functional carpel (3–state) (D2c), ER model

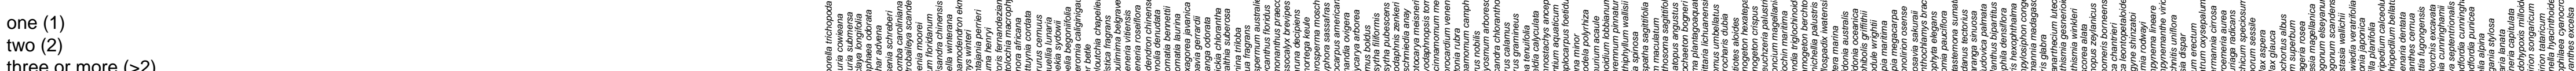

| Node             | ML state           | Prob   |
|------------------|--------------------|--------|
| Angiospermae     | one (1)            | 0.8172 |
| Mesangiospermae  | one (1)            | 0.8488 |
| Magnoliidae      | one (1)            | 0.8165 |
| Monocotyledoneae | one (1)            | 0.8365 |
| Eudicotyledoneae | one (1)            | 0.8241 |
| Commelinidae     | one (1)            | 0.9495 |
| Pentapetalae     | one (1)            | 0.9052 |
| Superasteridae   | one (1)            | 0.9592 |
| Asteridae        | one (1)            | 0.9715 |
| Lamiidae         | one (1)            | 0.5193 |
| Campanulidae     | one (1)            | 0.9733 |
| Superrosidae     | three or more (>2) | 0.4708 |
| Rosidae          | three or more (>2) | 0.483  |
| Malvidae         | three or more (>2) | 0.7999 |
| Fabidae          | two (2)            | 0.5256 |

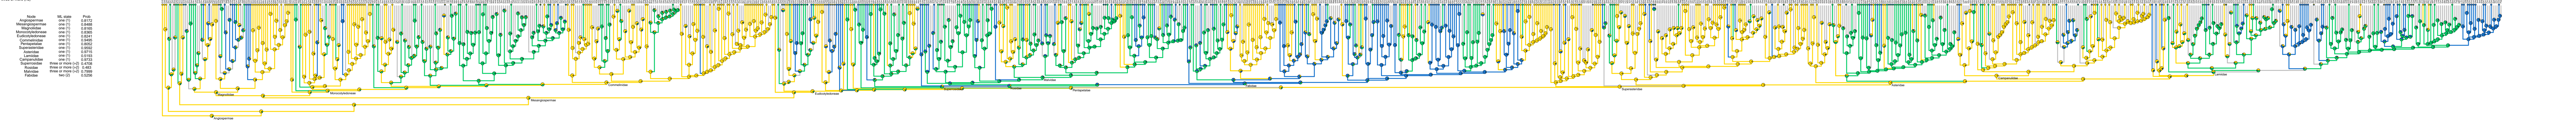

ML ancestral state reconstruction using rayDISC (R:corHMM)

412\_A. Placentation (D2d), ARD model

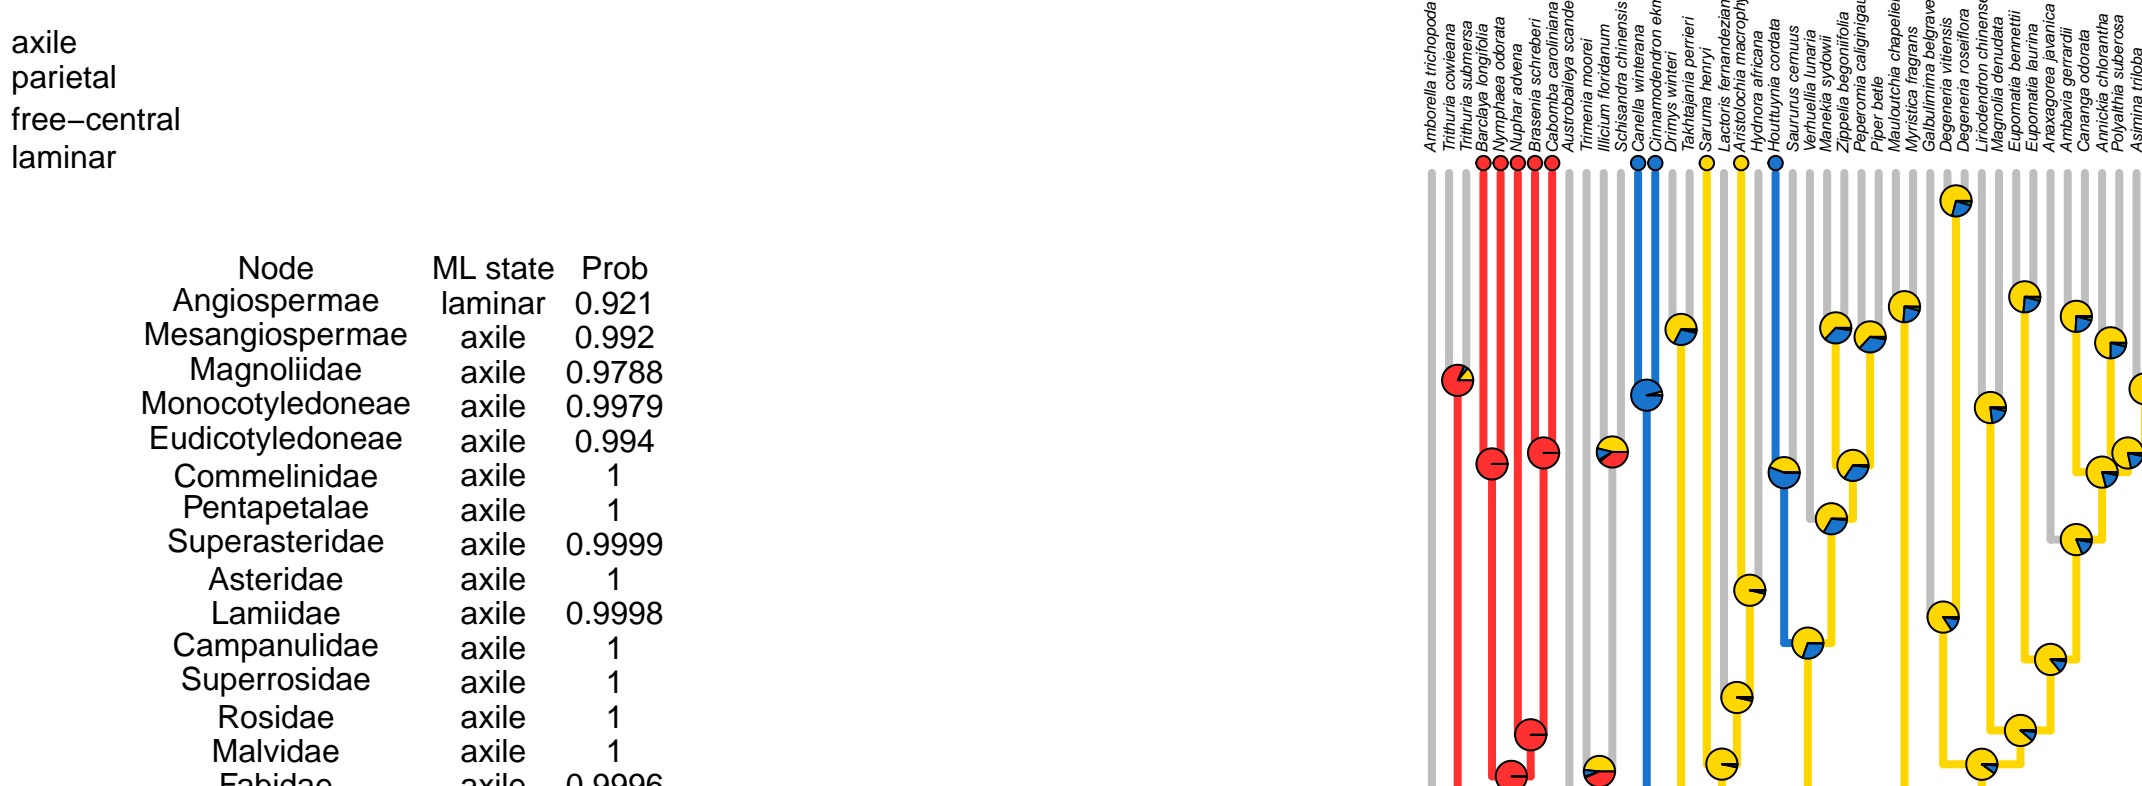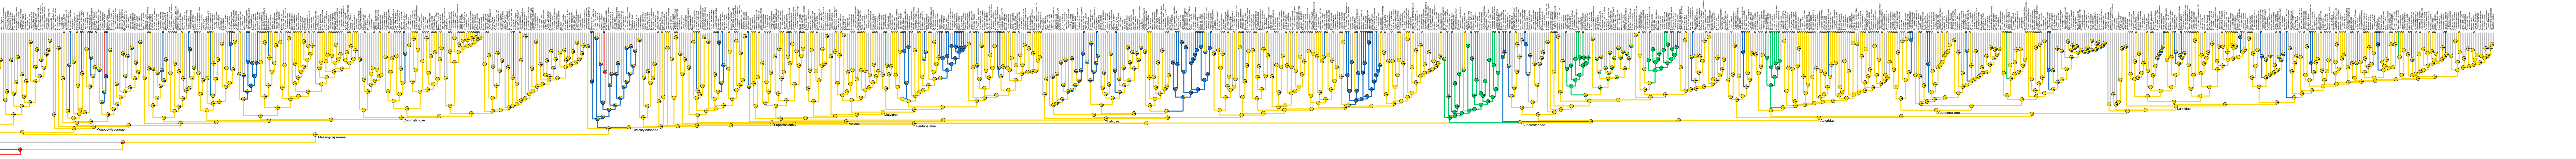

ML ancestral state reconstruction using rayDISC (R:corHMM)  
412\_A. Placentation (D2d), ER model

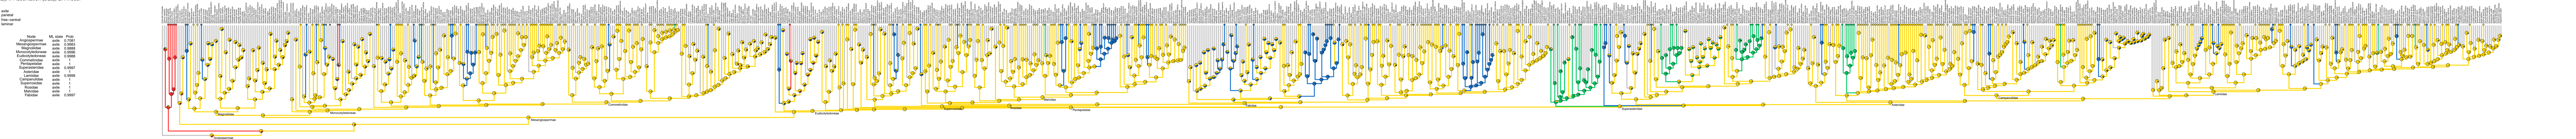

# ML ancestral state reconstruction using rayDISC (R:corHMM)

5000\_A. Number of apertures (D2c), ARD model

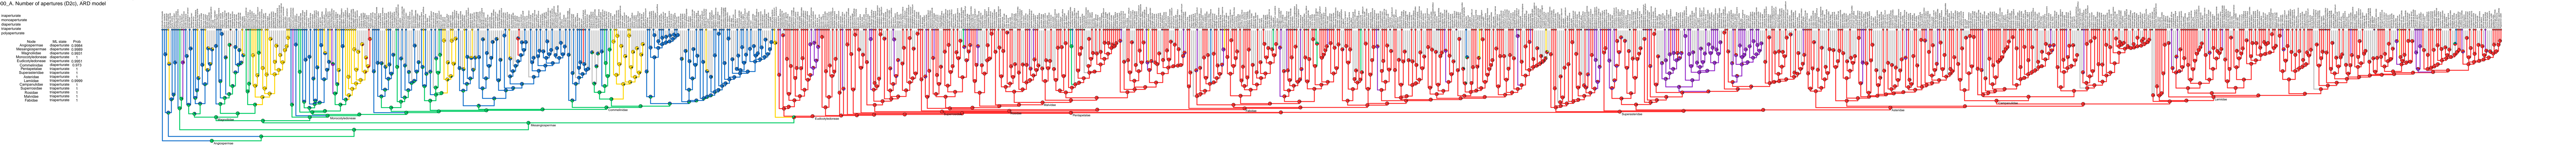

ML ancestral state reconstruction using rayDISC (R:corHMM)

5000\_A. Number of apertures (D2c), ER model

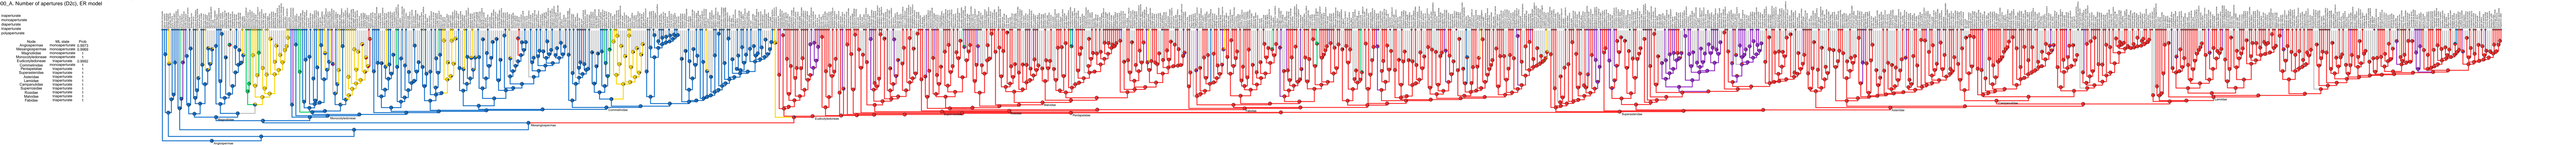

ML ancestral state reconstruction using rayDISC (R:corHMM)  
5002\_A. Aperture shape (D2d), ARD model

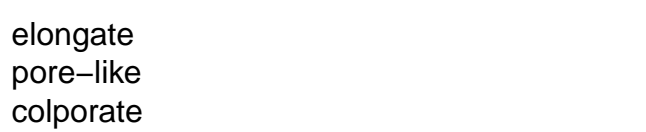

| Node             | ML state  | Prob   |
|------------------|-----------|--------|
| Angiospermae     | elongate  | 0.93   |
| Mesangiospermae  | elongate  | 0.9997 |
| Magnoliidae      | elongate  | 0.9998 |
| Monocotyledoneae | elongate  | 0.9999 |
| Eudicotyledoneae | elongate  | 0.9817 |
| Commelinidae     | elongate  | 0.9959 |
| Pentapetalae     | colporate | 0.8553 |
| Superasteridae   | colporate | 0.9993 |
| Asteridae        | colporate | 1      |
| Lamiidae         | colporate | 0.9999 |
| Campanulidae     | colporate | 1      |
| Superrosidae     | colporate | 0.9992 |
| Rosidae          | colporate | 0.9999 |
| Malvidae         | colporate | 1      |
| Fabidae          | colporate | 1      |

Angiospermae

Magnoliidae

Monocotyledoneae

Mesangiospermae

Eudicotyledoneae

Commelinidae

Superrosidae

Rosidae

Pentapetalae

Fabidae

Superasteridae

Asteridae

Campanulidae

Lamiidae

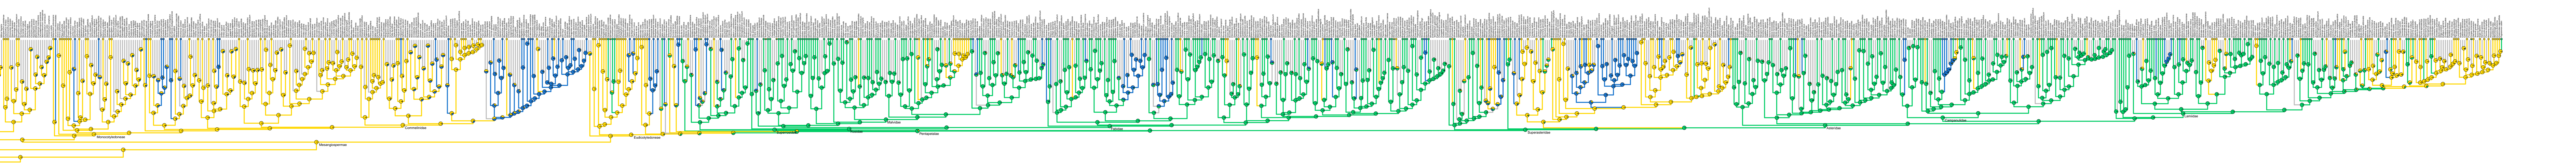

ML ancestral state reconstruction using rayDISC (R:corHMM)  
 5002\_A. Aperture shape (D2d), ER model

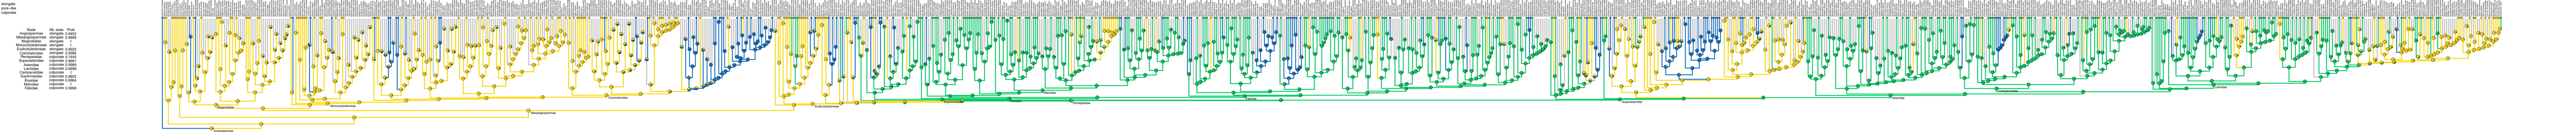

Supplement: Supplementary file 4 — Dataset S4 Ancestral state reconstructions for each character obtained with a maximum likelihood approach. [file NPH-241-1348-s005.pdf]
